1       **Jasmonate-regulated ERF109-MYB51-MYC3 ternary complexes**  
2                               **control indolic glucosinolates biosynthesis**

3       **kaixuan Zhang<sup>a#</sup>, Yu Meng<sup>a,b#</sup>, Jinbo Li<sup>a,c#</sup>, Mengqi Ding<sup>a</sup>, Muhammad Khurshid<sup>a,d</sup>, Qiong**  
4                               **Li<sup>e</sup>, Xiaoling Lu<sup>a</sup>, Meiliang Zhou<sup>a\*</sup>**

5       <sup>a</sup>Institute of Crop Sciences, Chinese Academy of Agricultural Sciences, Beijing 100081, China;

6       <sup>b</sup>College of Landscape and Travel, Agricultural University of Hebei, Baoding 071001, China;

7       <sup>c</sup>Life Science College, Luoyang Normal University, Luoyang 471934, China

8       <sup>d</sup>Institute of Biochemistry and Biotechnology, University of the Punjab, Lahore 54590, Pakistan;

9       <sup>e</sup> School of Nursing, Hunan University of Chinese Medicine, Changsha 410208, China

10       **RUNNING TITLE:** EMM complexes on glucosinolates biosynthesis.

11       **One-sentence summary:** The JA-responsive ERF109-MYB51-MYC3 ternary complex controls  
12       JAs-regulated GLSs biosynthesis.

13       **AUTHOR CONTRIBUTIONS**

14       M.Z. conceived and supervised the research. K.Z., Y.M., J.L., M.D., Q.L. and X.L. conducted the  
15       experiments. Y.M., J.L. and M.K. analyzed the data. K.Z., Y.M., J.L. M.K. and M.Z. wrote the  
16       paper.

17

18       This study is financially supported by the National Key R&D Program of China  
19       (2017YFE0117600), the National Natural Science Foundation of China (31871536) and the Young  
20       Talent Supporting Plan of The Crop Science Society of China (2017QNRC182).

21

22       <sup>#</sup>These authors contributed equally to the article.

23       \*Address correspondence to: Meiliang Zhou

24       Email: zhumeiliang@caas.cn

25       Tel: +86 10 82106368

26

27       Words Count: 6854 words (including Introduction, 1019; Results, 2711; Discussion, 1809;

28       Materials and Methods, 1284; Acknowledgements, 31)

29

30       No. of Figures: 7 (Fig.2b, 4e, 5b, 6b, 6c in color)

31       No. of Supporting files: 14 (Fig. S1-S13; Table S1)

32

1 **Keywords:** BPM family protein; Combinatorial interactions; Gene regulation; Indolic  
2 glucosinolates; Jasmonates; Secondary metabolism

3  
4 **Summary:**

5 Jasmonates (JAs) are plant hormones which regulate biosynthesis of many secondary metabolites,  
6 such as glucosinolates (GLSs), through JAs-responsive transcription factors (TFs). The  
7 JAs-responsive *CYP83B1* gene, has been shown to catalyze the conversion of  
8 indole-3-acetaldoxime (IAOx) to indolic glucosinolates (IGLSs). However, little is known about  
9 the regulatory mechanism of *CYP83B1* gene expression by JAs. In yeast one-hybrid screens using  
10 the *CYP83B1* promoter as bait we isolated two JAs-responsive TFs ERF109 and MYB51 that are  
11 involved in JAs-regulated IGLS biosynthesis. Furthermore, using a yeast two-hybrid assay, we  
12 identified ERF109 as an interacting partner of MYB51, and Jasmonate ZIM-domain (JAZ)  
13 proteins as interactors of MYB51, and BTB/POZ-MATH (BPM) proteins as interactors of  
14 ERF109. Both JAZ and BPM proteins are necessary for the full repression of the  
15 ERF109-MYB51-MYC3 ternary complex activity on *CYP83B1* gene expression and JA-regulated  
16 IGLS biosynthesis. Biochemical analysis showed that the 26S proteasome-mediated degradation  
17 of ERF109 protein is mediated by a CRL3<sup>BPM</sup> E3 ligase independently of JA signaling. Genetic  
18 and physiological evidence shows that MYB51 acts as an adaptor and activator to bridge the  
19 interaction with the co-activators MYC3 and ERF109, for synergistically activating the *CYP83B1*  
20 gene expression, and all three factors are essential and exert a coordinated control in JAs-induced  
21 IGLS biosynthesis. Overall, this study provides insights into the molecular mechanisms of  
22 JAs-responsive ERF109-MYB51-MYC3 ternary complexes in controlling JAs-regulated GLSs  
23 biosynthesis, which provides a better understanding of plant secondary metabolism.

24  
25 **One-sentence summary:** The JA-responsive ERF109-MYB51-MYC3 ternary complex controls  
26 JAs-regulated GLSs biosynthesis.

27

28 **INTRODUCTION**

29 Plants produce an enormous diversity of secondary metabolites. Not only These compounds  
30 mediate the interaction with biotic and abiotic environmental factors but also determine the food  
31 quality of crop plants. Glucosinolates (GLSs) are a group of plant secondary metabolites  
32 recognized for their distinctive benefits to human nutrition and plant defense. Unlike major classes  
33 of plant secondary metabolites, GLSs are largely limited to species of the order Brassicales,  
34 including important crops (e.g., broccoli, oilseed rape and cabbage) as well as the model plant  
35 *Arabidopsis thaliana* (Kliebenstein et al., 2005). In the GLS-defining core structure (the glucone),  
36 there has extensive side-chain modification and amino acid elongation which are responsible for  
37 the variation of its chemical structures (Grubb and Abel, 2006). Myrosinases, the enzymes  
38 responsible for GLS breakdown, co-exist with GLSs, are attacked by chewing herbivores, GLSs  
39 are hydrolysed by myrosinases into different unstable intermediates, leading to the rapid  
40 generation of the toxic compounds like thiocyanates, isothiocyanates, or nitriles, which play  
41 important roles in defense responses against pathogens and generalist herbivores, and in  
42 controlling soil-borne pathogens (Barth and Jander, 2006; Martínez-Ballesta et al., 2013). In  
43 addition, these final metabolites, such as isothiocyanates, influence the potential utility of plants,

1 by accounting for the distinctive flavors and exhibiting anticarcinogenic and antitumoral  
2 properties (Keck and Finley, 2004; Dinkova-Kostova and Kostov, 2012). Therefore, to rationally  
3 improve crop quality by engineering of GLS content, it is necessary to explore the molecular  
4 mechanism of GLS metabolism and regulatory network.

5 The biosynthesis of GLS has three different stages: 1) side-chain elongation of amino acids, 2)  
6 formation of the core GLS structure, and 3) secondary side-chain modifications (Sotelo et al.,  
7 2016). Based on the nature of the source amino acid, there are three different types of GLSs,  
8 aliphatic, indole and aromatic GLSs (Sotelo et al., 2016). During the chain elongation step,  
9 aliphatic undergo four successive reactions catalyzed by branched-chain amino acid  
10 aminotransferase (BCATs), methylthioalkylmalate synthase (MAMs), isopropylmalate isomerase  
11 (IPMIs) and isopropylmalate dehydrogenase (IPMDHs) (Ishida et al., 2014; Robin et al., 2016).  
12 Five cytochrome P450 monooxygenases 79 (CYP79), CYP79A2, CYP79B2 and CYP79B3,  
13 CYP79F1 and CYP79F2 have been shown to form the core GLS structure by catalyzing the  
14 conversion of amino acids chain-elongated methionines into aldoximes. These are further  
15 oxidized by CYP83A1 and CYP83B1 to form *S*-alkylthiohydroximates, and then cleaved by  
16 carbon-sulfur lyase (SUR1) which is further catalyzed into GLS structure by glutathione  
17 *S*-glucosyltransferases (GSTF), uridine diphosphate glucosyltransferase 74 (UGT74) and  
18 sulfotransferases (SOT) (Ishida et al., 2014; Robin et al., 2016). In last step of side chain  
19 modifications, three types of GLSs are oxygenated by three different enzymes. *S*-oxygenation of  
20 aliphatic GLSs (AGLSs) is carried out by a flavin monooxygenase (FMOGS-OXs) and the  
21 oxidation of indole GLSs (IGLSs) is catalyzed by CYP81F (Sønderby et al., 2010). Modified  
22 IGLSs originate from indole-3-ylmethyl-GLS (I3M), then the end products 4-methoxy-I3M  
23 (4MO-I3M) and 1-methoxy-I3M (1MO-I3M) are synthesized *via* hydroxylation and methylation  
24 of I3M (Pfalz et al., 2009, 2011).

25 During the last few years, many efforts have been made to discover the transcription factors (TFs)  
26 that regulate GLSs biosynthesis in Arabidopsis. Many reports show that TFs representing the  
27 subgroup 12 of R2R3-MYBs are mainly involved in the transcriptional regulation of GLS  
28 biosynthesis (Sánchez-Pujante et al., 2017). Furthermore, it has been reported that MYB28,  
29 MYB29, and MYB76 TFs are involved in the transcriptional regulation of AGLSs (Sønderby et al.,  
30 2007, 2010; Malitsky et al., 2008), while MYB34, MYB51, and MYB122 TFs are involved in the  
31 transcriptional regulation of IGLSs (Gigolashvili et al., 2009, Frerigmann and Gigolashvili, 2014).  
32 Then again, other types of TFs, such as IQD1 and Dof1.1, are known to regulate the biosynthesis  
33 of both AGLSs and IGLSs (Mikkelsen et al., 2003; Mewis et al., 2005; Kliebenstein et al., 2002;  
34 Brader et al., 2001; Skirycz et al., 2006). In general, the production of many kinds of secondary  
35 metabolites is induced by the plant stress hormones, jasmonates (JAs). The regulation of JA  
36 response occurs largely at the level of gene expression and protein accumulation (Zhou and  
37 Memelink, 2016). Several studies on different plant species indicated that JA induces the  
38 production of IGLSs and AGLSs, but not aromatic GLSs (Bodnaryk et al., 1994; Doughty et al.,  
39 1995; Brader et al., 2001; Mikkelsen et al., 2003; Sasaki-Sekimoto et al., 2005; Liu et al., 2010). It  
40 has been shown that MYB34, MYB122 and MYB29 plays key role in JA-mediated responses by  
41 inducing a set of genes involved in both AGLS and IGLS biosynthetic pathway (Hirai et al., 2007;  
42 Frerigmann and Gigolashvili, 2014). Interestingly, three JA-responsive basic helix-loop-helix  
43 (bHLH) TFs MYC2, MYC3 (bHLH05), and MYC4, not only directly activate the expression of  
44 GLS biosynthesis genes, but also as co-activators interact directly with GLS-related MYB TFs

1 (Schweizer et al., 2013; Frerigmann et al., 2014), indicating that JA signaling module is essential  
2 for GLSs biosynthesis.  
3 Combinatorial interactions among TFs are necessary to control gene expression in response to a  
4 variety of environmental signals, which will benefit the plant without being too costly.  
5 Indole-3-acetaldoxime (IAOx) is a key branching point between IGLSs and other metabolites  
6 (such as Auxin and camalexin) in Arabidopsis. Both CYP83B1 and CYP83A1/CYP83A1, the first  
7 key enzymes have been shown to catalyze the conversion of IAOx to IGLSs (Bak et al., 2001).  
8 MeJA treatment induces the expression of *CYP83B1* gene, but not *CYP83A1* (Mikkelsen et al.,  
9 2003) and triggers GLS accumulation (Liu et al., 2010). However, TFs regulating the *CYP83B1*  
10 gene expression is largely unknown. Scanning of promoter sequence motif suggests that the  
11 *CYP83B1* genes is regulated by one or more upstream TFs. This study was designed to search for  
12 such TFs. Using the fragments of the *CYP83B1* promoter as bait in a yeast one-hybrid (Y1H)  
13 screening, two TFs AP2/ETHYLENE RESPONSE FACTOR 109 (ERF109) and GLS-related  
14 MYB51 turned out to be interacting with the promoter, and both of them JA-responsive TFs.  
15 Furthermore, protein-protein interaction assays indicated that ERF109 interacts directly with  
16 MYB51. This specific ERF-MYB interaction is coordinately regulated under JA signaling  
17 pathway, and plays a crucial role in the transcriptional regulation of *CYP83B1* gene and GLSs  
18 biosynthesis.

19

## 20 RESULTS

### 21 ERF109 and MYB51 directly activate the *CYP83B1* promoter

22 To check whether *CYP83B1* and *CYP83A1* respond differentially to the upstream signaling  
23 molecule MeJA, we first analysed the expression of these two genes in wild-type (WT)  
24 Arabidopsis plants treated with MeJA. As shown in **Supplemental Fig. S1**, MeJA caused a  
25 significant induction of the expression of *CYP83B1*, but not of *CYP83A1*, which is consistent with  
26 a previous report (Mikkelsen et al., 2003). To identify more factors binding to the *CYP83B1*  
27 promoter, a yeast one-hybrid (Y1H) assay was performed using the various *CYP83B1* promoter  
28 fragments (**Supplemental Fig. S2**) as bait to screen a JA-treated Arabidopsis cDNA library (Li et  
29 al., 2018). Screening of the library with the fragment I (-19 bp to -214 bp) of the *CYP83B1*  
30 promoter gives positive colonies with yielding clones i.e. pACT/I-3 (At4g34410, ERF109) and  
31 pACT/I-6 (At1g18570, MYB51). However, the fragment II, III and IV gives no positive colony.  
32 To confirm the direct interaction between either ERF109 or MYB51 and the *CYP83B1* promoter,  
33 Electrophoresis mobility shift assay (EMSA) and chromatin immunoprecipitation assay (ChIP)  
34 quantitative PCR were performed. As shown in **Fig. 1a**, ERF109, MYB51 were able to bind to  
35 *CYP83B1* promoter fragment I. Binding of ERF109 and MYB51 were completely abolished when  
36 the ERF109 binding site GTCCACCT at positions -163 to -170 and the MYB51 binding site  
37 ACCAACC at the position -95 to -101 were mutated to GGGGGGGG and CCCCCC,  
38 respectively. Furthermore, a ChIP quantitative PCR assay showed that ERF109-HA and  
39 MYB51-HA fusion proteins binds to the *CYP83B1* promoter (**Fig. 1b and c**). These results  
40 confirmed that ERF109 and MYB51 bind directly to the promoter of the *CYP83B1* gene.

41 To study the trans-activation of the *CYP83B1* promoter by ERF109 and MYB51, Arabidopsis  
42 protoplasts were co-transformed with the reporter plasmid consisting of the *CYP83B1* promoter  
43 (-19 to -889) fused to GUS (*CYP83B1FLpro-GUS*), and the effector plasmids carrying either of  
44 the *ERF109* and *MYB51* genes. ERF109 and MYB51 were found to activate the

1 *CYP83B1FLpro*-GUS reporter gene 5 or 3 folds respectively, whereas the IGLS-associated MYB  
2 TFs MYB34 and MYB122 (Frerigmann and Gigolashvili, 2014), as a control reporter construct of  
3 *CYP83A1* promoter (-9 to -1019) was used which had no effect (**Fig. 1d** and **Supplemental Fig.**  
4 **S3**). These results indicates that ERF109 and MYB51 interacts and activates the *CYP83B1*  
5 promoter.

6

### 7 **ERF109 interacts directly with MYB51, but not MYC2/3/4**

8 The IGLS-associated TF MYB51 was previously shown to interact with MYC3, and the related  
9 bHLH TFs MYC2, MYC4 and bHLH28 (Schweizer et al., 2013; Frerigmann et al., 2014). Since  
10 ERF109, like MYB51, acts as a transcriptional activator in JA-responsive *CYP83B1* gene  
11 expression, we decided to perform a yeast two-hybrid (Y2H) assay to test whether MYB51 protein  
12 could interact with ERF109. MYC2/3/4 were also tested as positive controls. As shown in **Fig. 2a**,  
13 MYB51 interacts with MYC2/3/4 in consistence with previous reports (Schweizer et al., 2013;  
14 Frerigmann et al., 2014). Also, we saw that the MYB51–MYC3 interaction is stronger than  
15 MYB51–MYC2/4 interaction. Interestingly, MYB51, but not MYB34, interacts with ERF109 (**Fig.**  
16 **2a**), and this interaction depends on the C-terminus of MYB51 (MYB51CT) (**Supplemental Fig.**  
17 **S4**). However, ERF109 did not interact with MYC2/3/4 (**Supplemental Fig. S5**). To verify the  
18 interactions between MYB51 and ERF109 *in planta*, we performed bimolecular fluorescence  
19 complementation (BiFC) assays in Arabidopsis protoplasts. As shown in **Fig. 2b**, strong YFP  
20 signals were observed in Arabidopsis protoplasts upon co-expression of MYB51-cYFP and  
21 nYFP-ERF109. A similar result was observed upon co-expression of MYB51-cYFP with  
22 nYFP-MYC3 as a positive control. None or only background YFP fluorescence was detected upon  
23 co-expression of ERF109-cYFP with nYFP-MYC3 and in negative controls (nYFP-ERF109 or  
24 nYFP-MYC3 co-expressed with cYFP, and nYFP co-expressed with MYB51-cYFP). These  
25 results indicated that the ERF109 interacts with MYB51, but not MYC3. To verify the  
26 protein–protein interactions *in vitro*, we performed pull-down assays using HA- and Strep-tagged  
27 proteins (**Fig. 2c**). As shown in **Fig. 2c**, Strep-MYB51 interacts with either HA-ERF109 and  
28 HA-MYC3. These data are consistent with the results from yeast two-hybrid and BiFC assays.

29

### 30 **Combinatorial ERF109-MYB51-MYC3 interactions synergistically activate *CYP83B1* gene** 31 **expression**

32 Binding of MYB51 to MYC2/3/4 on the one hand, and to ERF109 on the other hand, supported an  
33 adaptor role for MYB51. To show that the proteins can form a multimeric complex *in vivo*, we set  
34 up a yeast three-hybrid bridge (Y3H) assay, where MYC2/3/4, fused to the GAL4 AD, was  
35 co-transformed with ERF109 fused to the GAL4 BD and unfused MYB51 or MYB34. The results  
36 from the colony-lift filter  $\beta$ -galactosidase assay, show that MYB51, but not MYB34, was able to  
37 function as an adaptor bridging the interaction between ERF109 and MYC2/3/4 (**Fig. 3a** and  
38 **Supplemental Fig. S6**).

39 To functionally test the interaction between ERF109, MYB51 and MYC3, protoplasts  
40 trans-activation assays were performed. Arabidopsis protoplasts were co-transformed with the  
41 identical amounts of over expression effector plasmids carrying ERF109, MYB51 or MYC3 and  
42 *CYP83B1FLpro*-GUS reporter construct. The results show that ERF109, MYB51 and MYC3 act  
43 synergistically instead of additively (**Fig. 3b**), indicating that they act dependently *via* interaction  
44 with the different target sites. MYC3 plasmid had no positive effect on ERF109 activity, an

1 additional positive effect was observed in the presence of MYB51 (**Fig. 3b**), suggesting that a  
2 ternary complex between ERF109, MYB51 and MYC3 is necessary for full activation.  
3 Co-expression of a C-terminal deletion derivative of MYB51 (MYB51NT, 1-117AA) did not lead  
4 to an additional positive effect on ERF109 activity, consistent with its inability to interact with  
5 both MYC3 (Schweizer et al., 2013) and ERF109 proteins in yeast, suggesting that  
6 MYC3-ERF109 exerts its additive effect *via* interaction with MYB51. To study whether MYB51  
7 acts *via* the binding site ACCAACC at positions -95 to -101, we mutated it generating the  
8 *mMBSCYP83B1FLpro*-GUS derivative. This mutation abolished GUS activity conferred by  
9 MYB51 (**Fig. 3c**), indicating that ACCAACC is the key site interacting with MYB51. Taken  
10 together, our experiments show that MYB51 acts as an adaptor and activator, bridge the  
11 interaction with the co-activators MYC3 and ERF109 for synergistically activating the *CYP83B1*  
12 gene expression.

### 14 **The ERF109-MYB51-MYC3 factors are involved in jasmonate-induced IGLS biosynthesis**

15 It was previously shown that the MYB51 and MYC3 are involved in JAS-induced IGLS  
16 accumulation (Schweizer et al., 2013; Frerigmann et al., 2014). To study further the role of  
17 *ERF109* gene in the biosynthesis of IGLS, homozygous loss-of-function alleles in *ERF109*  
18 (SALK\_150614, *erf109*) and over-expression lines of *ERF109* gene (CS2102255, OE<sup>ERF109</sup>) were  
19 analyzed. Compared with the WT plants, the *erf109* and OE<sup>ERF109</sup> lines showed no visible effects  
20 in plant morphology under the given growth conditions (Bahieldin et al., 2018). The level of  
21 IGLSs (I3M, 4MO-I3M, and 1MO-I3M) in the OE<sup>ERF109</sup> lines was higher compared to  
22 corresponding WT lines, under continuous light, without JA treatment (**Fig. 4a**). Interestingly, the  
23 much lower levels of all IGLSs in the *erf109* mutant, treated with MeJA under continuous light,  
24 together with the much higher levels of all IGLSs in OE<sup>ERF109</sup> plants, compared with the WT (**Fig.**  
25 **4a**), suggest a positive role of ERF109 in IGLSs regulation following environmental challenge.

26 To analyze whether the *ERF109*, *MYB51* and *MYC3* expression correlates with the level of IGLS  
27 biosynthesis and to reveal the contribution of each of the three TFs in IGLS biosynthesis, IGLS  
28 contents were analyzed in *erf109*, *myb51* (GK-228B12), *myc3* (GK445B11), *erf109myb51*,  
29 *myb51myc3*, *erf109myc3*, and *erf109myb51myc3* mutants. These mutants were analyzed for the  
30 accumulation of IGLS (**Fig. 4b-d**). As shown in **Fig. 4b-d**, IGLS biosynthesis were not affected in  
31 either of the single mutants and neither the *erf109myb51* and *erf109myc3* double mutant lines  
32 compared with the WT without JA treatment. Consistent with a previous report (Frerigmann et al.,  
33 2014), the concentration of IGLSs in the double *myb51myc3* mutant was substantially lower than  
34 that of single mutants and WT (**Fig. 4b-d**). Moreover, the IGLSs levels in the triple  
35 *erf109myb51myc3* mutant seedlings were significantly lower than that of the double *myb51myc3*  
36 mutant (**Fig. 4b-d**), especially upon JA treatment, suggesting the importance of ERF109 in the  
37 combinatorial regulation of IGLSs together with MYB51 and MYC3.

38 Subsequently, qRT-PCR was performed to investigate the expression patterns of six IGLSs  
39 biosynthesis genes (*CYP79B3*, *CYP83B1*, *CYP83A1*, *GSTF10*, *SUR1* and *UGT74B1*) in all lines  
40 with and without MeJA treatment. As expected, expression levels of these five IGLS genes (except  
41 *CYP83A1*) were very similar in the all single mutant, the double *erf109myb51* and *erf109myc3*  
42 mutant lines as compared to WT, contrasting with their significantly reduced expression in the  
43 double *myb51myc3* mutant and the triple *erf109myb51myc3* mutant seedlings under the non-JA  
44 treatment (**Fig. 4e and Supplemental Fig. S7**). However, lower expression levels of these five

1 IGLS genes in all mutant lines, especially in triple mutant, upon MeJA treatment compared with  
2 the non-MeJA treatment (**Fig. 4e and Supplemental Fig. S7**), indicated that the  
3 ERF109-MYB51-MYC3 complex has a role in the JA-mediated induction of IGLSs.

#### 4 5 **MYB51 interacts with the JA repressor JAZ10**

6 Most JAZ proteins were shown to interact with many TFs with a variety of different roles in  
7 regulating JAs-associated gene expression (Zhou and Memelink, 2016). These TFs include the  
8 bHLH TFs MYC2, MYC3 and MYC4 (Cheng et al., 2011; Fernández-Calvo et al., 2011; Niu et al.,  
9 2011), and R2R3-MYB TFs MYB21 and MYB24 (Song et al., 2011). Since MYB51 acts as a  
10 transcriptional activator in JAs-responsive *CYP83B1* gene expression, we performed Y2H assay to  
11 test whether MYB51 protein could interact with JAZ proteins or not. We used MYC3 as a positive  
12 control and MYB34 as a negative control. As shown in **Fig. 5a**, MYB34 cannot interact with any  
13 JAZ protein, but MYC3 interacted with all JAZ proteins except JAZ4 and JAZ7. This was  
14 consistent with previous reports (Chini et al., 2009; Fernández-Calvo et al., 2011). Interestingly,  
15 MYB51 only interacted with JAZ10. To investigate which domain of MYB51 is responsible for  
16 the interaction with JAZ10, we constructed plasmids with N-terminal parts (MYB51NT)  
17 containing the R2R3 domain and the C-terminal parts (MYB51CT), the JAZ10 N-terminal part  
18 (JAZ10NT) and C-terminal part (JAZ10CT). As shown in **Supplemental Fig. S8**, the N-terminal  
19 parts of the MYB51 protein was responsible for the interactions with JAZ10CT in yeast.

20 To verify the interactions between MYB51 and JAZ10 *in planta*, we performed BiFC assays in  
21 Arabidopsis protoplasts. As shown in **Fig. 5b**, strong YFP signals were observed upon  
22 co-expression of MYB51-cYFP with nYFP-JAZ10, MYB51NT-cYFP with nYFP-JAZ10, and  
23 MYB51-cYFP with nYFP-JAZ10CT, respectively. A similar result was observed upon  
24 co-expression of nYFP-MYC3 with JAZ10-cYFP as a positive control. None or only background  
25 YFP fluorescence was detected in negative controls (MYB51-cYFP co-expressed with nYFP or  
26 cYFP co-expressed with nYFP-JAZ10). To verify the protein-protein interaction *in vitro*, we  
27 performed pull-down assays using HA- and Strep-tagged proteins (**Fig. 5c**). As shown in **Fig. 5c**,  
28 Strep-MYB51 interacted with HA-JAZ10 but not HA-JAZ10NT. These results indicated that the  
29 MYB51 protein interacts with JAZ10 protein *in vitro* and *in vivo*.

#### 30 31 **ERF109 interacts with BPM family proteins, is degraded by the 26S proteasome and is** 32 **stabilized under JA treatment**

33 To identify proteins that interact with ERF109, Y2H screenings of an Arabidopsis seedling cDNA  
34 library were performed. Expression of full-length ERF109 fused to the GAL4 BD showed weak  
35 auto-activation that could be suppressed by the addition of 15 mM 3-AT in the medium. This  
36 resulted in the isolation 9 colonies that were able to grow on minimal medium lacking histidine.  
37 From these candidate ERF109 interactors, only one, cDNA sequence (9# clone), was in frame  
38 with the GAL4 AD. This plasmid contained a partial cDNA encoding the protein named BPM1  
39 (At5g19000), lacking the last 263 amino acids (**Fig. 6a**), demonstrating that this region is not  
40 essential for assembly with ERF109 protein. BPM1 consists of 442 amino acids and contains a  
41 BTB domain (203-347AA) in the middle of the protein and a MATH domain (38-150 AA) in the  
42 N-terminal region. It has been reported that BPM1 belongs to the BTB/POZ family, that includes  
43 six members, BPM1 to BPM6 (Weber et al., 2005). This suggested that ERF109 could interact  
44 with other BPM proteins. We could indeed confirm a ERF109-BPM3 interaction by Y2H assays

1 (Supplemental Fig. S9). Furthermore, the partial BPM1 (1-179 AA) in the Y2H screens  
2 demonstrated that the BTB domain is not involved in the interaction with ERF109. To further  
3 confirm that a full-length MATH domain is sufficient for binding to ERF109, we generated a new  
4 truncated BPM1 version of 120 amino acids (35-154 AA, BPM1-MATH) comprised of complete  
5 MATH domain. As shown in Supplemental Fig. S9, BPM1-MATH is capable of binding to  
6 ERF109, making it highly probable that only the MATH domain is required for BPM1-ERF109  
7 interaction. Likewise, we sought to determine which ERF109 region mediates the interaction with  
8 BPM1 protein. As shown in Supplemental Fig. S10, the N-terminal region of ERF109 was  
9 responsible for the interactions with BPM1. To further confirm the interaction of ERF109 with  
10 BPM1, BiFC assays were performed in Arabidopsis protoplasts. Interaction between ERF109 and  
11 BPM1 but also ERF109 and BPM1-MATH was visible in the nucleus (Fig. 6b). These results  
12 indicated that *in planta* ERF109 interacts with BPM1 in the nucleus.

13 It has been previously shown that the BTB / POZ family proteins could interact with CUL3  
14 proteins, which act as scaffolding subunits of multimeric E3-ligases that can target their substrates  
15 for degradation *via* the 26S proteasome (Weber et al., 2005). Since ERF109 acts as an interactor of  
16 BPM1 and is responsive to JA on gene expression level, we investigated its stability in protoplasts  
17 was associated with the 26S proteasome in JA dependent manner. A GFP-tagged ERF109 protein  
18 or just GFP was expressed in Arabidopsis protoplasts treated with JA, MG132, or the solvent  
19 DMSO. As a result, the C-terminal fusion of ERF109 with GFP was found in the nucleus of  
20 Arabidopsis protoplasts, and fluorescence microscopy showed that MG132 and JA, but not DMSO  
21 treatment, increased the abundance of ERF109-GFP in protoplasts (Fig. 6c). As shown in Fig. 6d,  
22 immunoblot analysis with anti-GFP antibodies of the total cellular protein revealed that JA or  
23 MG132 treatment drastically increased the amount of ERF109-GFP protein, while the amount of  
24 GFP as a negative control was not affected. In addition, the accumulated ERF109-GFP protein  
25 was observed in the leaf protoplasts of *bpm1bpm3* double mutant, but not in the single mutants  
26 and WT (Fig. 6e). These results indicated that ERF109 protein is subjected to 26S  
27 proteasome-mediated degradation through binding with BPM proteins and JA, stabilizes ERF109  
28 protein post-translationally.

29

### 30 **BPM and JAZ repress the activity of ERF109-MYB51-MYC3 Ternary Complexes**

31 In order to elucidate the functional significance of the interaction between BPM proteins and  
32 ERF109, JAZ proteins and MYB51, trans-activation assays were performed. Co-transformation of  
33 Arabidopsis protoplasts with a *CYP83B1FLpro*-GUS reporter construct and effector plasmids  
34 CaMV35S-ERF109, CaMV35S-MYB51 or CaMV35S-MYC3 resulted in strong activation of  
35 around 5-fold, 3-fold and 3-fold, respectively (Fig. 3b and Supplemental Fig. S11a). Addition of  
36 the JAZ10 effector plasmid resulted in the repression of MYB51 activity, and did not have a  
37 significant effect on the activity of ERF109, whereas the known MYC3 repressor JAZ10 had a  
38 strong repressive effect. In contrast to the effect of JAZ10, BPM1 significantly repressed the  
39 activity of ERF109 only, and did not affect either MYB51 or MYC3 activity (Supplemental Fig.  
40 S12a). These results are line with the above protein-protein interaction assays where JAZ10 was  
41 found to interact with MYB51 and MYC3, and BPM1 with ERF109. Furthermore, co-expression  
42 of JAZ10 or BPM1 with *CYP83B1FLpro*-GUS, ERF109, MYB51, and MYC3 dramatically  
43 reduced the GUS activity (Supplemental Fig. S12a), demonstrating that JAZ10 and BPM1  
44 represses the transcriptional function of ERF109-MYB51-MYC3 ternary complexes. However,



1 the higher amounts of JAZ10 or BPM1 plasmid had negative effect on *CYP83B1FLpro*-GUS  
2 activity (**Supplemental Fig. S12**). To investigate further, whether accumulation of endogenous  
3 MYB51 or ERF109 proteins could mediate the repression of JAZ10 or BPM1 on endogenous  
4 *CYP83B1* gene expression, we examined the expression of *CYP83B1* in the Arabidopsis *myb51*,  
5 *erf109*, *erf109myb51myc3* mutant and WT leaf protoplasts with over-expression of JAZ10 or  
6 BPM1. As shown in **Supplemental Fig. S12b**, the negative effect of JAZ10 or BPM1  
7 over-expression on *CYP83B1* gene expression was not observed in the *myb51* or *erf109* mutant,  
8 respectively, as compared to the WT, indicating that the negative effect of JAZ10 or BPM1 alone  
9 was mediated by endogenous MYB51 or ERF109 proteins serving as adaptors. In addition,  
10 over-expression of *JAZ10* or *BPM1* gene in Arabidopsis plants significantly decreased IGLS  
11 accumulation (**Supplemental Fig. S13**). Taken together, both JAZ10 and BPM1 are necessary for  
12 full repression of ERF109-MYB51-MYC3 **ternary complexes** at *CYP83B1* gene expression and  
13 IGLS biosynthesis level.

14

## 15 **DISCUSSION**

16 JAs, as the key signaling molecules, induce the expression of genes that are responsible for the  
17 biosynthesis of various secondary metabolites, such as GLS (Zhou and Memelink, 2016). JAs  
18 signaling results in the activation of TFs which regulate gene expression through binding to  
19 *cis*-acting elements of their target genes. Until now, several types of JAs-induced TFs that  
20 participate in the regulation of GLS biosynthesis have been characterized. These belong to the  
21 DOF, bHLH and MYB families (Skirycz et al., 2006; Sønderby et al., 2007, 2010; Malitsky et al.,  
22 2008; Gigolashvili et al., 2009, Frerigmann and Gigolashvili, 2014). However, our understanding  
23 about the molecular mechanisms of these TFs complexes in the regulation of GLSs biosynthesis is  
24 still lacking. In this study, we identified ERF109, an AP2/ERF (APETALA2/Ethylene-Response  
25 Factors), also called RRTF1 (REDOX RESPONSIVE TRANSCRIPTION FACTOR1), as an  
26 important regulator for IGLS biosynthesis. *ERF109* is highly responsive to MeJA and induces  
27 reactive oxygen species (ROS) accumulation (Cai et al., 2014; Matsuo et al., 2015). *CYP83B1* is  
28 the key enzyme which catalyzes the conversion of IAOx to IGLSs, importantly, this gene is  
29 strongly induced upon JAs signaling (Bak et al., 2001; Mikkelsen et al., 2003). Using the  
30 *CYP83B1* promoter as bait in a Y1H screening, two JAs-responsive TFs, ERF109 and MYB51,  
31 were identified (Schweizer et al., 2013; Cai et al., 2014). Further in a Y2H assay, we identified  
32 two BPMs as interacting partners of ERF109, and JAZ10 as an interacting partner of MYB51.  
33 Previous report shows that MYC2/3/4 are interacting partners of MYB34/51, and mediate the  
34 transcriptional regulation of IGLS biosynthesis (Schweizer et al., 2013; Frerigmann et al., 2014).  
35 In addition, there is high redundancy between MYC2/3/4 and MYB34/MYB51 in the regulation of  
36 IGLSs (Schweizer et al., 2013; Frerigmann et al., 2014). Thus, these specific JAs-responsive  
37 ERF-MYB-bHLH interactions play an essential role in the transcriptional activation of the  
38 *CYP83B1* gene and the production of IGLSs in plants.

39 Gene expression analysis of the triple *erf109myb51myc3* mutant revealed that IGLS biosynthetic  
40 genes are down-regulated, and thus the production of IGLSs impaired (**Fig. 4b-d**), indicating the  
41 important roles of ERF109, MYB51, and MYC3 in the regulation of IGLS biosynthesis. In  
42 contrast with the IGLS profile of the triple *erf109myb51myc3* mutant, the single mutants and  
43 *erf109myb51*, *erf109myc3* double mutants show similar IGLS levels compared to WT plants,  
44 indicating functional redundancy of ERF109. However, unlike the *erf109myb51* and *erf109myc3*

1 double mutants, the production of IGLSs was significantly affected in double *myb51myc3* mutant  
2 (**Fig. 4b-d**), pointing to an essential role of MYB51 and MYC3 in the production of IGLSs in the  
3 absence of JA. Based on this observation, it can be assumed that mainly MYC2/3/4 and MYB51  
4 and secondarily ERF109 are important in JA inducible *CYP83B1* gene regulation.  
5 The expression of a gene is determined by the *cis*-acting DNA elements located in the vicinity of  
6 the gene and the trans-acting TFs that interact with them. Until now, several *cis*-acting elements in  
7 various gene promoters that mediate JA responsiveness have been identified. The most common  
8 *cis*-acting elements in JAs-responsive promoter sequences are the G-box (CACGTG) or  
9 G-box-like sequences (e.g. CACCTG) (Zhou and Memelink, 2016). In this study, the promoter  
10 motif analysis of *CYP83B1* gene showed that a G-box-like sequence CACCTG is present at the  
11 position -120 to -125. It has been previously reported that AC-rich sequences, such as  
12 ACC[A/T]A[A/C][T/C] and ACC[A/T][A/C/T][A/C/T], are typical motifs important for binding  
13 R2R3-MYB TFs (Prouse and Campbell, 2012; Chezem and Clay, 2016). Here, we showed that  
14 MYB51 directly binds to the AC-rich sequence ACCAACC at the position -95 to -101, similarly  
15 to the way that ZmMYB31 binds the maize lignin gene promoters containing the ACC(T/A)ACC  
16 consensus sequence (Fornalé et al., 2010). The AP2/ERF family is a large group of TFs that  
17 contain AP2/ERF-type DNA binding domains, and can bind different *cis*-elements such as a  
18 GCC-box and a DRE element (Mizoi et al., 2012). Here, we show that ERF109 binds the  
19 GTCCACCT element at the position -163 to -170, this element includes a CCAC motif which is  
20 very similar to the coupling-element 1 (CE1)-like sequence recognized by the AP2/ERF TF ABI4  
21 (ABA-INSENSITIVE 4) (Mizoi et al., 2012). In the *CYP83B1* gene promoter, three binding  
22 motifs were located in the 200 nucleotides upstream of the start codon ATG, which may allow  
23 complex regulation of gene expression in response to multiple changes in external and internal  
24 environments.  
25 Gene regulation of plant's secondary metabolism typically involves formation multiprotein  
26 complexes through combinatorial interactions between different families or subfamilies of TF  
27 protein. For example, the interactions between MYB, bHLH and WD40 domain proteins form the  
28 MYB-bHLH-WD40 (MBW) complexes that can activate a set of biosynthetic genes in  
29 anthocyanin biosynthesis (Quattrocchio et al., 2006; Zhou and Memelink, 2016). In this ternary  
30 complex, the MYB protein recognizes its *cis*-regulatory element and typically provides regulatory  
31 specificity for a given target pathway in plant secondary metabolism, the bHLH proteins act as  
32 cofactors to regulate the activity of MYB factors and is considered redundant, while the conserved  
33 WD40 domain proteins are essential for the integrity of the MBW complexes (Feller et al., 2011).  
34 Recently, interactions between proteins of different subfamilies such as, MYB and bHLH family  
35 have been shown to regulate different gene modules in GLSs biosynthesis (Schweizer et al., 2013;  
36 Frerigmann et al., 2014; Li and Sack, 2014). In this study, we demonstrated that a key GLS  
37 biosynthetic pathway gene is not only under transcriptional control of MYBs and bHLHs as was  
38 previously shown (Schweizer et al., 2013; Frerigmann et al., 2014), but is also regulated by  
39 AP2/ERFs. In addition, ERF109, MYB51 and MYC2/3/4 proteins form the  
40 ERF109-MYB51-MYCs (EMM) complexes using MYB51 as an adaptor. This conclusion was  
41 made from the results which showed. ERF109 binds directly to the CE element and activates the  
42 *CYP83B1* gene expression. The amount of IGLSs in the triple *erf109myb51myc3* mutant is  
43 strongly impaired, and combinatorial gain of function of ERF109, MYB51 and MYC3 proteins  
44 has an additive effect on the *CYP83B1* gene expression. Finally, MYB51 not only binds to the

1 AC-rich sequence, but also could act as an adaptor to bridge the interactions with MYC2/3/4 and  
2 ERF109 in our Y3H assays. These results point to indispensable roles to the transcriptional control  
3 of GLSs genes for AP2/ERF, MYB and bHLH proteins.

4 The Skp-Cullin-F-box protein complex containing COI1 (SCF<sup>COI1</sup>) facilitates the degradation of  
5 JAZ proteins (JASmonate ZIM domain), key repressors within JA signaling cascades through the  
6 ubiquitin-26S proteasome pathway. The JAZs repress a variety of TFs that have different roles in  
7 regulating JAs-responsive gene expression (Zhou and Memelink, 2016). In the JAs-regulated  
8 anthocyanin biosynthesis, JAZ proteins directly interact with bHLH and MYB factors of MBW  
9 complexes, impair their transcriptional activity, repressing anthocyanin biosynthesis (Qi et al.,  
10 2011). Previous reports showed that JAZ proteins interact with MYC3, and that mutating the JAZ  
11 Interaction Domain (JID) of MYC3 inhibited the interaction with JAZ proteins, thereby increasing  
12 the MYC3 activity resulting in elevated **GLS levels** (Frerigmann et al., 2014). Here, we  
13 demonstrated that JAZ10 directly interacts with MYB51 and MYC3, and attenuated their  
14 transcriptional function. Over-expression of *JAZ10* in plants significantly decreased the  
15 accumulations of both anthocyanin and IGLSs (**Supplemental Fig. S13**), indicating that MYB51,  
16 like MYC3, is regulated by JAZ repressors.

17 Several JA-responsive members of the AP2/ERF family function as key regulators in plant  
18 secondary metabolite biosynthesis, including monoterpenoid indole alkaloid, nicotine and  
19 artemisinin biosynthesis (Zhou and Memelink, 2016). It has been reported that ERF109 is a  
20 JAs-responsive factor and mediates the cross-talk JA and auxin (Cai et al., 2014). Recently,  
21 ERF109 has also been shown to directly activate a set of biosynthetic enzyme genes and promote  
22 tryptophan biosynthesis and tryptophan metabolism (Bahieldin et al., 2018). Here, we show that  
23 ERF109 is directly involved in the regulation of IGLS biosynthesis. In this study, JAs control  
24 ERF109 not only at the transcriptional level, but also on the *de novo* synthesized protein. Our  
25 western blot results showed that JA directly affects ERF109 protein activity by inducing  
26 stabilization, and this established ERF109 as a component of JA signal transduction. In addition,  
27 ERF109 was also stabilized by MG132, indicating that it's degraded via 26S proteasome. It has  
28 been widely accepted that E3 ubiquitin (UBQ) ligase binds to the UBQ conjugating enzyme E2  
29 and a substrate protein to facilitate transfer of the UBQ moiety, and thereby the ubiquitylated  
30 protein is marked for degradation via the 26S proteasome (Hua and Vierstra, 2011). CULLIN3  
31 (CUL3)-based Really Interesting New Gene (RING) E3 ligases (CRL3) are composed of the  
32 scaffolding subunit CUL3 protein, the RING-finger protein RING-Box protein 1 (RBX1) which  
33 binds to the C-terminal region of CUL3, while the N-terminal part of CUL3 is recognized by  
34 proteins containing a BTB/POZ fold (Hua and Vierstra, 2011). BTB/POZ-MATH (BPM) family  
35 contains a MATH domain located in their N-terminal region and a BTB/POZ fold in their  
36 C-terminal region (Weber and Hellmann, 2009). It has been shown that the MATH domain of  
37 BPM proteins is used to assemble with members of the AP2/ERF TFs, such as RELATED TO  
38 APETALA2.4 (RAP2.4) and WRINKLED1 (WRI1) (Weber and Hellmann, 2009; Chen et al.,  
39 2013). In addition, it has been demonstrated that the degradation of WRI1 by 26S proteasome  
40 depends on the CRL3<sup>BPM</sup> E3 ligase in the fatty acid metabolism (Chen et al., 2013). In this study,  
41 we confirmed the interactions between ERF109 and the MATH domain of BPM proteins, and the  
42 stability of ERF109 is controlled by CRL3<sup>BPM</sup> E3 ligase, which is in agreement with the instability  
43 of WRI1, mediated by a CRL3<sup>BPM</sup> E3 ligase (Chen et al., 2013). Overall, it is likely that BPM  
44 proteins, as potential regulators, affect the transcriptional activity and protein stability of AP2/ERF

1 TFs in higher plant.

2 In conclusion, we proposed a ‘relief of repression’ model for the function of the  
3 ERF109-MYB51-MYC3 **ternary complexes** in controlling the key enzyme *CYP83B1* gene  
4 expression and JA-regulated GLS biosynthesis (**Fig. 7**). This model proposes that JAs promote  
5 GLS biosynthesis *via* the degradation of JAZ proteins which interact with MYB51 and MYC3 that  
6 control *CYP83B1* gene transcription, and the stability of ERF109 which is a target by CRL3<sup>BPM</sup> E3  
7 ligase. It is fascinating that both BPM and JAZ proteins interact with ERF109-MYB51-MYC3  
8 which function as repressors of JAs responsive ERF-MYB-bHLH activity. Further comparative  
9 investigation of the regulatory mechanisms of ERF-MYB interaction will provide a better  
10 understanding of plant secondary metabolism.

11

## 12 **MATERIALS AND METHODS**

### 13 **Yeast one hybrid assays**

14 The promoter fragments of *CYP83B1proI* (-214 to -1), *CYP83B1proII* (-430 to -193),  
15 *CYP83B1proIII* (-648 to -410) and *CYP83B1proIV* (-889 to -628) were PCR-amplified from  
16 genomic DNA of *A. thaliana* digested with NotI and SmaI and fused to a TATA box-*His3* gene in  
17 plasmid pHIS3NX, respectively. Through homologous recombination, the *His3* gene constructs  
18 were integrated in the yeast (strain Y187) genome (Zhou et al., 2015; Li et al., 2018). After  
19 transformation of the JA-treated Arabidopsis cDNA libraries in the different *CYP83B1pro* yeast  
20 strains, cells were grown on synthetic dextrose minimal medium lacking Leu and His (SD/-LH)  
21 supplemented with increasing 3-amino-1,2,4-triazole (3-AT; Sigma) concentrations ranging from 0  
22 to 15 mM, respectively. The positive colonies were confirmed by re-transformation and  
23 sequencing. All primer sequences are mentioned in **Supplemental Table S1**.

24

### 25 **Yeast two/three hybrid assays**

26 The open reading frames (ORFs) of ERF109, MYB34, MYB51, MYC2/3/4, BPM1-5, JAZ1-12  
27 and their deletion derivatives, ERF109NT, ERF109CT, MYB51NT, MYB51CT, BPM1-MATH,  
28 JAZ10NT and JAZ10CT were cloned into pACT2 or pAS2.1 vectors (Zhou et al., 2015).  
29 pAS2.1-ERF109 was used as bait for yeast two-hybrid screening. Co-transformation of  
30 pAS2.1-ERF109 and Arabidopsis cDNA libraries, or any bait and prey plasmids, was performed  
31 into yeast strain PJ64-4A according to the protocol as previously described (Zhou et al., 2015). For  
32 the three-hybrid bridge assay, the *MYB51* and MYB34 was cloned in pYPGE15 (Brunelli and Pall,  
33 1993) and p423GPD (Mumberg et al., 1995) for Ura synthesis, respectively. The positive  
34 transformants could grow on SD/-LWH and SD/-LWHU selection media, and the colony-lift filter  
35  $\beta$ -galactosidase assay was performed as described in the Yeast Protocols Handbook (Clontech).  
36 **Supplemental Table S1** shows sequence of all the primers used in this study, all constructed  
37 plasmids were sequenced.

38

### 39 **EMSA**

40 To produce His-tagged proteins, ERF109 and MYB51 were PCR amplified and cloned in  
41 pASK-IBA45plus. These constructs were transformed into *Escherichia coli* strain BL21 (DE3)  
42 pLysS for protein extraction according to the protocol as previously described (Zhou et al., 2017;  
43 Li et al., 2018). EMSAs were performed using biotin-labeled double-stranded probes (*CYP83B1*  
44 promoter fragment I and its mutants) and the Light Shift Chemiluminescent EMSA Kit according

1 to the manufacturer's instructions (Thermo Fisher). All primer sequences are mentioned in  
2 **Supplemental Table S1.**

3

#### 4 **ChIP-qPCR and qRT-PCR Assay**

5 The plasmid pRT101-ERF109-HA and pRT101-MYB51-HA (5 µg) were transformed into  
6 *Arabidopsis* cell suspension protoplasts. After 18 h incubation at 28°C under dark condition,  
7 protoplasts were harvested and washed with PBS buffer (1% formaldehyde, pH 7.4) to crosslink  
8 the proteins to the DNA at 4°C (Li et al., 2018). HA antibody (Roche, Mannheim, Germany) was  
9 used for immunoprecipitation of chromatin-bound proteins. qPCR was performed using primers  
10 designed on the flanking sequence of MYB51 and ERF109-binding sites in *CYP83B1* promoter.  
11 The coding region of *CYP83B1* gene and the reference gene *UBQ10* promoter were used as a  
12 negative control. ChIP assays were performed as previously described (Zhou et al., 2017; Li et al.,  
13 2018). Total RNA extraction and reverse transcription (Revert Aid first-strand cDNA synthesis kit;  
14 Fermentas) were performed according to the manufacturer's instructions and qRT-PCR was  
15 performed as previously described (Zhou et al., 2017; Li et al., 2018). The qPCR primers for six  
16 IGLSs biosynthesis genes (*CYP79B3*, *CYP83B1*, *CYP83A1*, *GSTF10*, *SUR1* and *UGT74B1*) were  
17 used as previously described (Hirai et al. 2007; Frerigmann et al., 2014; Frerigmann and  
18 Gigolashvili, 2014). All primer sequences are mentioned in **Supplemental Table S1.**

19

#### 20 **Arabidopsis protoplast trans-activation assays**

21 The full-length *ERF109*, *MYB34*, *MYB122*, *MYB51*, *MYB51NT*, *MYB51CT*, *MYC3*, *JAZ10*,  
22 *JAZ10NT*, *JAZ10CT* and *BPM1* were PCR amplified cloned into effector plasmid pRT101 under  
23 the CaMV 35S promoter (Töpfer et al., 1987). The promoter fragments of *CYP83B1* pro-fused  
24 GUS were cloned in reporter plasmid GusXX (Töpfer et al., 1987). *Arabidopsis* cell suspension or  
25 leaf protoplasts were co-transformed with effector plasmids together with reporter plasmid as  
26 previously described (Schirawski et al., 2000; He et al., 2007). GUS activity assays were  
27 performed as previously described (van der Fits and Memelink, 1997). All primer sequences are  
28 mentioned in **Supplemental Table S1.**

29

#### 30 **BiFC**

31 The N-terminal (YN) or C-terminal (YC) fragments of the yellow fluorescent protein (nYFP or  
32 cYFP) were fused either N-terminally or C-terminally with MYB51, MYB51NT, ERF109, MYC3,  
33 BPM1, BPM1-MATH, JAZ10 and JAZ10CT and cloned in pRTL2-YNEE (nYFP-) or  
34 pRTL2-HAYC (-cYFP). The all possible combinations of nYFP and cYFP fusion protein  
35 constructs were transiently co-expressed in *Arabidopsis* cell suspension as previously described  
36 (Schirawski et al., 2000). Microscopy images were acquired with a Leica DM IRBE confocal laser  
37 scanning microscope and analyzed using the ImageJ software (Abràmoff et al., 2004; Zhou et al.,  
38 2017). All primer sequences are mentioned in **Supplemental Table S1.**

39

#### 40 **Plant materials and growth conditions**

41 *Arabidopsis thaliana* ecotype Columbia-0 (Col-0) was used as the wild-type plant. The knockout  
42 T-DNA insertion lines *erf109* (SALK\_150614, namely KO<sup>ERF109</sup>) and over-expression lines of  
43 *erf109* gene (CS2102255, namely OE<sup>ERF109</sup>) of locus *AT4G34410* were provided by the SALK  
44 Institute, Genomic Analysis Laboratory (SIGnAL) (<http://signal.salk.edu/tdnaprimers.2.html>). The

1 T-DNA insertion lines *myb51* and *myc3* (GK445B11) had been described previously  
2 (Gigolashvili et al., 2007; Frerigmann et al., 2014). Pollen from homozygous *myb51* plants were  
3 used to pollinate emasculated homozygous *erf109* and *myc3* flowers to generate *erf109myb51* and  
4 *myb51myc3* double homozygous plants. The triple mutant *erf109myb51myc3* plants were  
5 generated from a cross between *myb51myc3* and *erf109* plants. For JA treatments, two-week-old  
6 20–25 seedlings of each genotype under continuous light were treated for different time periods  
7 with 50  $\mu$ M JA (Sigma-Aldrich, St. Louis, MO, USA) dissolved in dimethylsulfoxide (DMSO,  
8 0.05% final concentration). As a control, seedlings were treated with 0.05% DMSO.

9

#### 10 **Immunoblot analysis**

11 The full-length *ERF109* and *JAZ10* were PCR amplified cloned into pTH2 under the CaMV 35S  
12 promoter to generate ERF109-GFP and JAZ10-GFP proteins constructs. Transformed Arabidopsis  
13 protoplasts were ground in 50  $\mu$ L of cold protein extraction buffer (50 mM HEPES-KOH pH 7.2,  
14 100 mM NaCl, 5 mM EDTA, 5 mM EGTA, 50 mM  $\beta$ -glycerophosphate, 50 mM NaF, 1% Triton  
15 X-100, 1 mM  $\text{Na}_3\text{VO}_4$ , 5  $\mu$ g/ml leupeptin, 5  $\mu$ g/ml antipain, 5 mM DTT and 1 mM  
16 phenylmethylsulfonyl fluoride (PMSF)). After centrifugation at 12000 rpm for 15 min at 4°C,  
17 supernatants were separated on SDS-PAA gels and transferred to protran nitrocellulose by semidry  
18 blotting. The Western blots with GFP peroxidase antibodies (1:2000; Roche) were performed as  
19 previously described (Zhou et al., 2015). All primer sequences are mentioned in **Supplemental**  
20 **Table S1**.

21

#### 22 **In Vitro Pull-Down Assay**

23 To produce HA-tagged proteins, *MYC3*, *ERF109*, *JAZ10* and *JAZ10NT* were PCR amplified and  
24 cloned in pASK-IBA45plus. To produce Strep-tagged proteins, *MYB51* was amplified and cloned  
25 in pASK-IBA45plus. These constructs were transformed into *E. coli* strain BL21 (DE3) pLysS for  
26 protein expression. The soluble Strep- and HA-fusion proteins were extracted and immobilized  
27 onto Strep-tactin Sepharose (IBA) and anti-HA agarose beads (Thermo Scientific), respectively.  
28 Pull-down assays were performed as described previously (Zhou et al., 2016). All primer  
29 sequences are presented in **Supplemental Table S1**.

30

#### 31 **Measurement of IGLSs**

32 The isolation and quantification of the concentration of I3M, 4MO-I3M, and 1MO-I3M were  
33 performed using the desulpho-GS method on a UPLC (Waters, Eschborn) as described recently  
34 (Gigolashvili et al., 2012; Frerigmann et al., 2014; Frerigmann and Gigolashvili, 2014).

35

#### 36 **Statistical analysis**

37 All data were analyzed using Student's t-test and one-way ANOVA. Values of  $P < 0.05$  were  
38 considered to be significant.

39

#### 40 **Accession numbers**

41 Sequence data for the genes described in this article can be found in the Arabidopsis Genome  
42 Initiative or GenBank/EMBL databases under the following accession numbers: ERF109  
43 (At4g34410), MYB51 (At1g18570), MYC2 (At1g32640), MYC3 (At5g46760), MYC4  
44 (At4g17880), MYB34 (At5g60890), MYB122 (At1g74080), JAZ1 (At1g19180), JAZ2

1 (At1g74950), JAZ3 (At3g17860), JAZ4 (At1g48500), JAZ5 (At), JAZ6 (At1g72450), JAZ7  
2 (At2g34600), JAZ8 (At1g30135), JAZ9 (At1g70700), JAZ10 (At5g13220), JAZ11 (At3g43440),  
3 JAZ12 (At5g20900), BPM1 (At5g19000), BMP2 (At3g06190), BPM3 (At2g39760), BPM4  
4 (At3g03740), BPM5 (At5g21010), BPM6 (At3g43700), CYP79B3 (At2g22330), CYP83B1  
5 (At4g31500), CYP83A1 (At4g13770), GSTF10 (At2g30870), SUR1 (At2g20610), UGT74B1  
6 (At1g24100), and UBQ10 (At4g05320).

7

## 8 ACKNOWLEDGEMENTS

9 We are grateful to Dr. Karel Miettinen (Department of Plant and Environmental Sciences,  
10 University of Copenhagen) for valuable comments. This research was supported by the National  
11 Key R&D Program of China (2017YFE0117600), the National Natural Science Foundation of  
12 China (31871536) and the Young Talent Supporting Plan of The Crop Science Society of China  
13 (2017QNRC182).

14

## 15 AUTHOR CONTRIBUTIONS

16 M.Z. conceived and supervised the research. K.Z., Y.M., J.L., M.D., Q.L. and X.L. conducted the  
17 experiments. Y.M., J.L. and M.K. analyzed the data. K.Z., Y.M., J.L. M.K. and M.Z. wrote the  
18 paper.

19

## 20 Supplemental Data

21 The following supplemental materials are available.

22 **Supplemental Figure S1.** Expression pattern of *CYP83B1* and *CYP83A1* in 2-week-old plant  
23 seedlings treated with 50  $\mu$ M MeJA for various times (in h) as indicated by qRT-PCR.

24 **Supplemental Figure S2.** Different fragments of *CYP83B1* gene promoter sequence.

25 **Supplemental Figure S3.** Trans-activation assays of *CYP83B1* and *CYP83A1* promoter by  
26 MYB51, MYB34 and MYB122.

27 **Supplemental Figure S4.** ERF109 interacts directly with MYB51 C-terminal in quantitative Y2H  
28 assays.

29 **Supplemental Figure S5.** ERF109 did not interact with MYC2/3/4 in quantitative Y2H assays.

30 **Supplemental Figure S6.** MYB51 can bridge the interaction between ERF109 and MYC2/4.

31 **Supplemental Figure S7.** Expression levels of *CYP79B3*, *CYP83B1*, *CYP83A1*, *GSTF10*, *SUR1*  
32 and *UGT74B1* in 2-week-old different genotypes seedlings treated with 50  $\mu$ M MeJA for various  
33 times (in h) as indicated by qRT-PCR.

34 **Supplemental Figure S8.** MYB51 N-terminal interacts directly with JAZ10 C-terminal in  
35 quantitative Y2H assays.

36 **Supplemental Figure S9.** ERF109 interacts directly with BPM family proteins in quantitative  
37 Y2H assays.

38 **Supplemental Figure S10.** BPM1 interacts directly with ERF109 N-terminal in quantitative Y2H  
39 assays.

40 **Supplemental Figure S11.** BPM and JAZ repress the activity of ERF109-MYB51-MYC3 Ternary  
41 Complexes.

42 **Supplemental Figure S12.** Trans-activation assays of *CYP83B1* promoter by different amounts of  
43 JAZ10 and BPM1.

44 **Supplemental Figure S13.** Over-expressed *JAZ10* and *BPM1* represses the accumulation of IGLS.

1 **Supplemental Table S1.** Primers used in this study.

2

3

4

5 **REFERENCES**

- 6 **Abràmoff MD, Magalhães PJ, Ram SJ** (2004) Image processing with ImageJ. *Biophotonics*  
7 *International* **11**: 36–42
- 8 **Bahieldin A, Atef A, Edris S, Gadalla NO, Ramadam AM, Hassan SM, Attas SG, Al-Kordy**  
9 **MA, Al-Hajar AS, Sabir JS, Nasr ME, Osman GH, El-Domyati FM** (2018)  
10 Multifunctional activities of ERF109 as affected by salt stress in Arabidopsis. *Scientific*  
11 *Report* **8**: 6403
- 12 **Bak S, Tax FE, Feldmann KA, Galbraith DW, Feyereisen R** (2001) CYP83B1, a cytochrome  
13 P450 at the metabolic branch point in auxin and indole glucosinolate biosynthesis in  
14 *Arabidopsis*. *Plant Cell* **13**: 101–111
- 15 **Barth C, Jander G** (2006) *Arabidopsis* myrosinases TGG1 and TGG2 have redundant function in  
16 glucosinolate breakdown and insect defense. *Plant J* **46**: 549–562
- 17 **Bodnaryk RP** (1994) Potent effect of jasmonates on indole glucosinolates in oilseed rape and  
18 mustard. *Phytochemistry* **35**: 301–305
- 19 **Brader G, Tas E, Palva ET** (2001) Jasmonate-dependent induction of indole glucosinolates in  
20 *Arabidopsis* by culture filtrates of the nonspecific pathogen *Erwinia carotovora*. *Plant*  
21 *Physiol* **126**: 849–860
- 22 **Brunelli JP, Pall ML** (1993) A series of yeast/*Escherichia coli* lambda expression vectors  
23 designed for directional cloning of cDNAs and *cre/lox*-mediated plasmid excision. *Yeast* **9**:  
24 1309–1318
- 25 **Cai XT, Xu P, Zhao PX, Liu R, Yu LH, Xiang CB** (2014) *Arabidopsis* ERF109 mediates  
26 cross-talk between jasmonic acid and auxin biosynthesis during lateral root formation. *Nat*  
27 *Commun* **5**: 5833
- 28 **Chen L, Lee JH, Weber H, Tohge T, Witt S, Roje S, Fernie AR, Hellmann H** (2013)  
29 *Arabidopsis* BPM proteins function as substrate adaptors to a cullin3-based E3 ligase to  
30 affect fatty acid metabolism in plants. *Plant Cell* **25**: 2253–2264
- 31 **Cheng Z, Sun L, Qi T, Zhang B, Peng W, Liu Y, Xie D** (2011) The bHLH transcription factor  
32 MYC3 interacts with the Jasmonate ZIM-domain proteins to mediate jasmonate response in  
33 *Arabidopsis*. *Mol Plant* **4**: 279–288
- 34 **Chezem WR, Clay NK** (2016) Regulation of Plant Secondary Metabolism and Associated  
35 Specialized Cell Development by MYBs and bHLHs. *Phytochemistry* **131**: 26–43
- 36 **Chini A, Fonseca S, Chico JM, Fernández-Calvo P, Solano R** (2009) The ZIM domain  
37 mediates homo- and heteromeric interactions between Arabidopsis JAZ proteins. *Plant J* **59**:  
38 77–87
- 39 **Dinkova-Kostova AT, Kostov RV** (2012) Glucosinolates and isothiocyanates in health and  
40 disease. *Trends Mol Med* **18**: 337–347
- 41 **Doughty, K.J., Kiddle, G.A., Pye, B.J., Wallsgrove, R.M., and Pickett, J.A.** (1995) Selective  
42 induction of glucosinolates in oilseed rape leaves by methyl jasmonate. *Phytochemistry* **38**:  
43 347–350
- 44 **Feller A, Machemer K, Braun EL, Grotewold E** (2011) Evolutionary and comparative analysis



- 1 of MYB and bHLH plant transcription factors. *Plant J* **66**: 94–116
- 2 **Fernández-Calvo P, Chini A, Fernández-Barbero G, Chico JM, Gimenez-Ibanez S, Geerinck**  
3 **J, Eeckhout D, Schweizer F, Godoy M, Franco-Zorrilla JM, Pauwels L, Witters E, Puga**  
4 **MI, Paz-Ares J, Goossens A, Reymond P, De Jaeger G, Solano R** (2011) The *Arabidopsis*  
5 bHLH transcription factors MYC3 and MYC4 are targets of JAZ repressors and act  
6 additively with MYC2 in the activation of jasmonate responses. *Plant Cell* **23**: 701–715
- 7 **Fits LVD, Memelink J** (1997) Comparison of the activities of CaMV 35S and FMV 34S  
8 promoter derivatives in *Catharanthus roseus* cells transiently and stably transformed by  
9 particle bombardment. *Plant Mol Biol* **33**: 943–946
- 10 **Fornalé S, Shi X, Chai C, Encina A, Irar S, Capellades M, Fuguet E, Torres JL, Rovira P,**  
11 **Puigdoménech P, Rigau J, Grotewold E, Gray J, Caparrós-Ruiz D** (2010) ZmYB31  
12 directly represses maize lignin genes and redirects the phenylpropanoid metabolic flux. *Plant*  
13 *J* **64**: 633–644
- 14 **Frerigmann H, Berger B, Gigolashvili T** (2014) bHLH05 Is an Interaction Partner of MYB51  
15 and a Novel Regulator of Glucosinolate Biosynthesis in *Arabidopsis*. *Plant Physiol* **166**:  
16 349–369
- 17 **Frerigmann H, Gigolashvili T** (2014) MYB34, MYB51, and MYB122 distinctly regulate indolic  
18 glucosinolate biosynthesis in *Arabidopsis thaliana*. *Mol Plant* **7**: 814–828
- 19 **Gigolashvili T, Berger B, Flügge UI** (2009) Specific and coordinated control of indolic and  
20 aliphatic glucosinolate biosynthesis by R2R3-MYB transcription factors in *Arabidopsis*  
21 *thaliana*. *Phytochem Rev* **8**: 3–13
- 22 **Gigolashvili T, Berger B, Mock HP, Müller C, Weisshaar B, Flügge UI** (2007) The  
23 transcription factor HIG1/MYB51 regulates indolic glucosinolate biosynthesis in *Arabidopsis*  
24 *thaliana*. *Plant J* **50**: 886–901
- 25 **Gigolashvili T, Geier M, Ashykhmina N, Frerigmann H, Wulfert S, Krueger S, Mugford SG,**  
26 **Kopriva S, Haferkamp I, Flügge UI** (2012) The *Arabidopsis* thylakoid ADP/ATP carrier  
27 TAAC has an additional role in supplying plastidic phosphoadenosine 5'-phosphosulfate to  
28 the cytosol. *Plant Cell* **24**: 4187–4204
- 29 **Grubb CD, Abel S** (2006) Glucosinolate metabolism and its control. *Trends Plant Sci* **11**: 89–100
- 30 **He P, Shan L, Sheen J** (2007) The use of protoplasts to study innate immune responses. *Methods*  
31 *Mol Biol* **354**: 1–9
- 32 **Hirai MY, Sugiyama K, Sawada Y, Tohge T, Obayashi T, Suzuki A, Araki R, Sakurai N,**  
33 **Suzuki H, Aoki K, Goda H, Nishizawa OI, Shibata D, Saito K** (2007) Omics-based  
34 identification of *Arabidopsis* Myb transcription factors regulating aliphatic glucosinolate  
35 biosynthesis. *Proc Natl Acad Sci USA* **104**: 6478–6483
- 36 **Hua Z, Vierstra RD** (2011) The cullin-RING ubiquitin-protein ligases. *Annu Rev Plant Biol* **62**:  
37 299–334
- 38 **Keck AS, Finley JW** (2004) Cruciferous vegetables: cancer protective mechanisms of  
39 glucosinolate hydrolysis products and selenium. *Integr Cancer Ther* **3**: 5–12
- 40 **Kliebenstein D, Pedersen D, Barker B, Mitchell-Olds T** (2002) Comparative analysis of  
41 quantitative trait loci controlling glucosinolates, myrosinase and insect resistance in  
42 *Arabidopsis thaliana*. *Genetics* **161**: 325–332
- 43 **Ishida M, Hara M, Fukino N, Kakizaki T, Morimitsu Y** (2014) Glucosinolate metabolism,  
44 functionality and breeding for the improvement of *Brassicaceae* vegetables. *Breeding Sci* **64**:

- 1 48–59.
- 2 **Kliebenstein DJ, Kroymann J, Mitchell-olds T** (2005) The glucosinolate-myrosinase system in  
3 an ecological and evolutionary context. *Curr Opin Plant Biol* **8**: 264–271
- 4 **Li J, Zhang K, Meng Y, Hu J, Ding M, Bian J, Yan M, Han J, Zhou M** (2018) Jasmonic  
5 acid/ethylene signaling coordinates hydroxycinnamic acid amides biosynthesis through  
6 ORA59 transcription factor. *Plant J* **95**: 444–457
- 7 **Li M, Sack FD** (2014) Myrosin idioblast cell fate and development are regulated by the  
8 Arabidopsis transcription factor FAMA, the auxin pathway, and vesicular trafficking. *Plant*  
9 *Cell* **26**: 4053–4066
- 10 **Liu F, Jiang H, Ye S, Chen WP, Liang W, Xu Y, Sun B, Sun J, Wang Q, Cohen JD, Li C**  
11 (2010) The *Arabidopsis* P450 protein CYP82C2 modulates jasmonate-induced root growth  
12 inhibition, defense gene expression and indole glucosinolate biosynthesis. *Cell Res* **20**:  
13 539–552
- 14 **Malitsky S, Blum E, Less H, Venger I, Elbaz M, Morin S, Eshed Y, Aharoni A** (2008) The  
15 transcript and metabolite networks affected by the two clades of *Arabidopsis* glucosinolate  
16 biosynthesis regulators. *Plant Physiol* **148**: 2021–2049
- 17 **Martínez-Ballesta MC, Moreno DA, Carvajal M** (2013) The physiological importance of  
18 glucosinolates on plant response to abiotic stress in *Brassica*. *Int J Mol Sci* **14**: 11607–11625
- 19 **Matsuo M, Johnson JM, Hieno A, Tokizawa M, Nomoto M, Tada Y, Godfrey R, Obokata J,**  
20 **Sherameti I, Yamamoto YY, Böhmer FD, Oelmüller R** (2015) High REDOX  
21 RESPONSIVE TRANSCRIPTION FACTOR1 Levels Result in Accumulation of Reactive  
22 Oxygen Species in *Arabidopsis thaliana* Shoots and Roots. *Mol Plant* **8**:1253–1273
- 23 **Mewis I, Appel HM, Hom A, Raina R, Schultz JC** (2005) Major signaling pathways modulate  
24 *Arabidopsis* glucosinolate accumulation and response to both phloem-feeding and chewing  
25 insects. *Plant Physiol* **138**: 1149–1162
- 26 **Mikkelsen MD, Petersen BL, Glawischnig E, Jensen AB, Andreasson E, Halkier BA** (2003)  
27 Modulation of *CYP79* genes and glucosinolate profiles in *Arabidopsis* by defense signaling  
28 pathways. *Plant Physiol* **131**: 298–308
- 29 **Mizoi J, Shinozaki K, Yamaguchi-Shinozaki K** (2012) AP2/ERF family transcription factors in  
30 plant abiotic stress responses. *Biochimica et Biophysica Acta* **1819**: 86–96
- 31 **Mumberg D, Müller R, Funk M** (1995) Yeast vectors for the controlled expression of  
32 heterologous proteins in different genetic backgrounds. *Gene* **156**: 119–122
- 33 **Niu Y, Figueroa P, Browse J** (2011) Characterization of JAZ-interacting bHLH transcription  
34 factors that regulate jasmonate responses in *Arabidopsis*. *J Exp Bot* **62**: 2143–2154
- 35 **Pfalz M, Mikkelsen MD, Bednarek P, Olsen CE, Halkier BA, Kroymann J** (2011) Metabolic  
36 engineering in *Nicotiana benthamiana* reveals key enzyme functions in *Arabidopsis* indole  
37 glucosinolate modification. *Plant Cell* **23**: 716–729
- 38 **Pfalz M, Vogel H, Kroymann J** (2009) The gene controlling the Indole Glucosinolate Modifier1  
39 quantitative trait locus alters indole glucosinolate structures and aphid resistance in  
40 *Arabidopsis*. *Plant Cell* **21**: 985–999
- 41 **Prouse MB, Campbell MM** (2012) The interaction between MYB proteins and their target DNA  
42 binding sites. *Biochimica et Biophysica Acta* **1819**: 67–77
- 43 **Qi T, Song S, Ren Q, Wu D, Huang H, Chen Y, Fan M, Peng W, Ren C, Xie D** (2011) The  
44 jasmonate-ZIM-domain proteins interact with the WD repeat/bHLH/MYB complexes to

- 1 regulate Jasmonate-mediated anthocyanin accumulation and trichome initiation in  
2 *Arabidopsis thaliana*. *Plant Cell* **23**: 1795–1814
- 3 **Quattrocchio F, Verweij W, Kroon A, Spelt C, Mol J, Koes R** (2006) PH4 of petunia is an  
4 R2R3 MYB protein that activates vacuolar acidification through interactions with  
5 basic-helix-loop-helix transcription factors of the anthocyanin pathway. *Plant Cell* **18**:  
6 1274–1291
- 7 **Robin AH, Yi GE, Laila R, Yang K, Park JI, Kim HR, Nou IS** (2016) Expression profiling of  
8 glucosinolate biosynthetic genes in *Brassica oleracea* L. var. capitata inbred lines reveals  
9 their association with glucosinolate content. *Molecules* **21**: 787
- 10 **Sánchez-Pujante PJ, Borja-Martínez M, Pedreño MÁ, Almagro L** (2017) Biosynthesis and  
11 bioactivity of glucosinolates and their production in plant in vitro cultures. *Planta* **246**: 19–32
- 12 **Sasaki-Sekimoto Y, Taki N, Obayashi T, Aono M, Matsumoto F, Sakurai N, Suzuki H, Hirai**  
13 **MY, Noji M, Saito K, Masuda T, Takamiya K, Shibata D, Ohta H** (2005) Coordinated  
14 activation of metabolic pathways for antioxidants and defence compounds by jasmonates and  
15 their roles in stress tolerance in *Arabidopsis*. *Plant J* **44**: 653–668
- 16 **Schirawski J, Planchais S, Haenni AL** (2000) An improved protocol for the preparation of  
17 protoplasts from an established *Arabidopsis thaliana* cell suspension culture and infection  
18 with RNA of turnip yellow mosaic tymovirus: a simple and reliable method. *J Virol Methods*  
19 **86**: 85–94
- 20 **Schweizer F, Fernández-Calvo P, Zander M, Diez-Diaz M, Fonseca S, Glauser G, Lewsey**  
21 **MG, Ecker JR, Solano R, Reymond P** (2013) Arabidopsis basic helix–loop–helix  
22 transcription factors MYC2, MYC3, and MYC4 regulate glucosinolate biosynthesis, insect  
23 performance, and feeding behavior. *Plant Cell* **25**: 3117–3132
- 24 **Skiryycz A, Reichelt M, Burow M, Birkemeyer C, Rolcik J, Kopka J, Zanor MI, Gershenzon**  
25 **J, Strnad M, Szopa J, Mueller-Roeber B, Witt I** (2006) DOF transcription factor AtDof1.1  
26 (OBP2) is part of a regulatory network controlling glucosinolate biosynthesis in *Arabidopsis*.  
27 *Plant J* **47**:10–24
- 28 **Sotelo T, Velasco P, Soengas P, Rodríguez VM, Cartea ME** (2016) Modification of leaf  
29 glucosinolate contents in *Brassica oleracea* by divergent selection and effect on expression  
30 of genes controlling glucosinolate pathway. *Front Plant Sci* **7**: 10–12
- 31 **Sønderby IE, Geu-Flores F, Halkier BA** (2010) Biosynthesis of glucosinolates–gene discovery  
32 and beyond. *Trends Plant Sc* **15**: 283–290
- 33 **Sønderby IE, Hansen BG, Bjarnholt N, Ticconi C, Halkier BA, Kliebenstein DJ** (2007) A  
34 systems biology approach identifies a R2R3 MYB gene subfamily with distinct and  
35 overlapping functions in regulation of aliphatic glucosinolates. *PLoS One* **2**: e1322
- 36 **Song S, Qi T, Huang H, Ren Q, Wu D, Chang C, Peng W, Liu Y, Peng J, Xie D** (2011) The  
37 jasmonate-ZIM domain proteins interact with the R2R3-MYB transcription factors MYB21  
38 and MYB24 to affect jasmonate regulated stamen development in *Arabidopsis*. *Plant Cell* **23**:  
39 1000–1013
- 40 **Töpfer R, Matzeit V, Gronenborn B, Schell J, Steinbiss HH** (1987) A set of plant expression  
41 vectors for transcriptional and translational fusions. *Nucleic Acids Res* **15**: 5890
- 42 **Weber H, Bernhardt A, Dieterle M, Hano P, Mutlu A, Estelle M, Genschik P, Hellmann H**  
43 (2005) Arabidopsis AtCUL3a and AtCUL3b form complexes with members of the BTB /  
44 POZ-MATH protein family. *Plant Physiol* **137**: 83–93

- 1 **Weber H, Hellmann H** (2009) Arabidopsis thaliana BTB/ POZ-MATH proteins interact with  
2 members of the ERF/AP2 transcription factor family. *FEBS J* **276**: 6624–6635
- 3 **Zhou M, Memelink J** (2016) Jasmonate-responsive transcription factors regulating plant  
4 secondary metabolism. *Biotechnol Adv* **34**: 441–449
- 5 **Zhou M, Sun Z, Li J, Wang D, Tang Y, Wu Y** (2016) Identification of JAZ1-MYC2 Complex in  
6 *Lotus corniculatus*. *J Plant Growth Regul* **35**: 440–448
- 7 **Zhou M, Sun Z, Wang C, Zhang X, Tang Y, Zhu X, Shao J, Wu Y** (2015) Changing a  
8 conserved amino acid in R2R3-MYB transcription repressors results in cytoplasmic  
9 accumulation and abolishes their repressive activity in *Arabidopsis*. *Plant J* **84**: 395–403

10  
11

## 12 **Figure Legends:**

13 **Figure 1. ERF109 and MYB51 binds and activate CYP83B1 promoter.** **a**, EMSA of a wild type  
14 or mutated *CYP83B1* promoter fragment I with His-MYB51 and His-ERF109. The arrow  
15 indicates the protein probe complex. **b and c**, ChIP assays show MYB51 (**b**) and ERF109 (**c**) bind  
16 to the promoter of *CYP83B1*. ChIP assays were conducted by real-time PCR after normalizing  
17 with the input DNA. The reference gene *UBQ10* promoter and the fragment of *CYP83B1* coding  
18 sequence were used as a negative control. **d**, ERF109 and MYB51 trans-activate the *CYP83B1*  
19 promoter. Trans-activation assays of *CYP83B1* and *CYP83A1* promoter by ERF109 and MYB51.  
20 Arabidopsis cell suspension protoplasts were co-transformed with plasmids carrying 2 µg  
21 *CYP83B1FLpro-GUS* or *CYP83A1pro-GUS* and 2 µg overexpression vectors containing  
22 35S::ERF109 or 35S::MYB51, as indicated. Asterisks denotes one-way analysis of variance t test  
23 significance \*\*P < 0.01 and \*P < 0.05 and ns (not significant different). Values represent mean  
24 standard error (SE) of triplicate experiments and are expressed relative to the control.

25

26 **Figure 2. ERF109 interacts with MYB51 in vitro and in vivo.** **a**, ERF109 interacts with MYB51  
27 in quantitative Y2H assays. Yeast cells expressing ERF109, MYC2 or MYC3 proteins fused to the  
28 GAL4 AD and MYB34 or MYB51 fused to the GAL4 BD were spotted on SD/-LW medium to  
29 select for the plasmids and on SD/-LWH medium containing 10 mM 3-amino-1,2,4-triazole (3AT)  
30 to select for transcriptional activation of the *His-3* and β-galactosidase gene. A liquid culture  
31 β-galactosidase assay was performed on the transformed yeasts after 5 d growth. The activity of  
32 β-galactosidase was measured in arbitrary units. Values are means ±SD of three biological repeats.  
33 Asterisks denotes one-way analysis of variance (ANOVA) test significance \*\*P < 0.01 and \*P < 0.05

1 and ns (not significant different). **b**, Bimolecular fluorescence complementation (BiFC) assays in  
2 planta. YFP fluorescence images alone or merged with bright-field images of Arabidopsis cell  
3 suspension protoplasts co-transformed with constructs encoding the indicated fusion proteins with  
4 YFP at the C terminus or the N terminus. Bar = 10  $\mu$ m. **c**, In vitro interaction between HA-MYC3  
5 or HA-ERF109 and Strep-MYB51. HA-MYC3 or HA-ERF109 protein was incubated with  
6 immobilized Strep-MYB51. The immuno-precipitated fractions were detected with anti-HA  
7 antibody. Input was detected with anti-Strep antibody. Asterisks denote bands from HA antibody.

8

9 **Figure 3. Combinatorial ERF109-MYB51-MYC3 interactions synergistically activate**  
10 **CYP83B1 gene expression.** **a**, MYB51 can bridge the interaction between ERF109 and MYC3.  
11 Yeast cells expressing MYC3 fused to GAL4AD, ERF109 fused to GAL4BD and MYB51 protein  
12 or corresponding control plasmids were spotted on minimal (-3 = -LWH) or selective SD medium  
13 (-4 = -LWHA), growth and the activity of  $\beta$ -galactosidase assay was performed on the transformed  
14 yeast cells after 5 d growth. Yeast cells transformed with the empty plasmids were used as control.  
15 **b** and **c**, Trans-activation assays of *CYP83B1* and *mMBCYP83B1* promoter by ERF109, MYB51  
16 and MYC3. Arabidopsis cell suspension protoplasts were co-transformed with plasmids carrying 2  
17  $\mu$ g *CYP83B1FLpro-GUS* or *mMBCYP83B1FLpro-GUS* and 2  $\mu$ g overexpression vectors  
18 containing 35S::ERF109, 35S::MYB51, 35S::MYB51NT or 35S::MYC3, as indicated. Values are  
19 means  $\pm$ SE of three biological repeats. Asterisks denotes one-way analysis of variance (ANOVA)  
20 test significance \* $P$ <0.05.

21

22 **Figure 4. The ERF109-MYB51-MYC3 factors are involved in jasmonate-induced IGLS**  
23 **biosynthesis.** **a**, MeJA induced the accumulation of IGLS in wild-type (Col-0), OE<sup>ERF109</sup> (OE) and  
24 *erf109* (KO) Arabidopsis plants. The three major IGLS I3M, 4MO-I3M and 1MO-I3M content of  
25 two-week-old plants grown on MS plates and treated with 50  $\mu$ M MeJA for 16h and 32h. **b-d**,  
26 MeJA-induced accumulation of I3M (**b**), 4MO-I3M (**c**) and 1MO-I3M (**d**) in *myb51myc3* and  
27 *erf109myb51myc3* loss-of-function mutants. The three major IGLS I3M, 4MO-I3M and 1MO-I3M  
28 content of two-week-old Col-0, *erf109*, *myb51*, *myc3*, *erf109myb51*, *myb51myc3*, *erf109myc3*,  
29 *erf109myb51myc3* plants grown on MS plates and treated with 50  $\mu$ M MeJA for 32h. Data are  
30 presented as means  $\pm$  SE from three independent experiments with four biological replicates.

1 Significant differences between values are indicated with different letters ( $P < 0.05$ , one-way  
2 ANOVA). **e**, Expression pattern of *CYP79B3*, *CYP83B1*, *CYP83A1*, *GSTF10*, *SURI* and  
3 *UGT74B1* in 2-week-old different genotypes seedlings treated with 50  $\mu\text{M}$  MeJA for various times  
4 (in h) as indicated by qRT-PCR. *UBQ10* was used as an internal control. Mock denotes JA  
5 treatment for 0 h. Heat maps were generated by Microsoft excel based on expression levels.  
6 Different shades indicate higher or lower expression as indicated by expression bar.

7  
8 **Figure 5. MYB51 interacts with JAZ10 in vitro and in vivo.** **a**, MYB51 interacts with JAZ10 in  
9 quantitative Y2H assays. Yeast cells expressing MYB51, MYB34 or MYC3 proteins fused to the  
10 GAL4 AD and JAZ1-12 fused to the GAL4 BD. A liquid culture  $\beta$ -galactosidase assay was  
11 performed on the transformed yeast cells after 5 d growth. Values are means  $\pm$ SD of three  
12 biological repeats. Asterisks denotes one-way analysis of variance (ANOVA) test significance \*\* $P$   
13  $< 0.01$  and \* $P < 0.05$  and ns (not significant different). +++, ++ and + represent very strong, strong  
14 and weak interaction, respectively. **b**, BiFC assays in planta. YFP fluorescence images alone or  
15 merged with bright-field images of Arabidopsis cell suspension protoplasts co-transformed with  
16 constructs encoding the indicated fusion proteins with YFP at the C terminus or the N terminus.  
17 Bar = 10  $\mu\text{m}$ . **c**, In vitro interaction between Strep-MYB51 and HA-JAZ10 or HA-JAZ10NT.  
18 HA-JAZ10 or HA-JAZ10NT protein was incubated with immobilized Strep-MYB51. The  
19 immuno-precipitated fractions were detected with anti-HA antibody. Input was detected with  
20 anti-Strep antibody. Asterisks denote bands from HA antibody.

21

22 **Figure 6. ERF109 interacts with BPM family proteins resulting into its degradation by 26S**  
23 **proteasome pathway.** **a**, ERF109 interacts with BPM1 lacking the last 263 amino acids in Y2H  
24 screening. Schematic representation of BPM1 protein. **b**, BiFC assays of the interaction between  
25 ERF109 and BPM1 or BPM1-MATH domain in planta. YFP fluorescence images alone or merged  
26 with bright-field images of Arabidopsis cell suspension protoplasts co-transformed with constructs  
27 encoding the indicated fusion proteins with YFP at the C terminus or the N terminus. Bar = 10  $\mu\text{m}$ .  
28 **c** and **d**, ERF109 is degraded by the 26S proteasome and stabilized under JA treatment. **c**,  
29 Confocal laser scanning microscopy images of Arabidopsis protoplasts expressing ERF109-GFP  
30 or GFP. Eighteen hours after transformation, protoplasts were treated for 2 and 4 h with 50  $\mu\text{M}$

1 MG132, 50  $\mu$ M MeJA or 0.1 % DMSO. Bar = 20  $\mu$ m. **d** and **e**, Transiently expressed  
2 ERF109-GFP and GFP proteins in Col-0, *bpm1*, *bpm3*, *bpm1bpm3* Arabidopsis protoplasts. The  
3 proteins were extracted 18 h after transformation of protoplasts and detected with anti-GFP  
4 antibodies.

5

6 **Figure 7. The ‘relief of repression’ model for the function of ERF109-MYB51-MYC3 ternary**  
7 **complexes in controlling the key enzyme *CYP83B1* gene expression and JAs-regulated GLSs**  
8 **biosynthesis.** All three TFs are recruited to the promoters of *CYP83B1* gene to activate its  
9 expression; MYB51 binds to AC-rich sequence, MYC2/3/4 bind to G-box-like sequence, whereas  
10 ERF109 binds to CE element. Without JAs, BPM proteins interact with ERFs, function as  
11 substrate adaptors to CUL3-based E3-ligases CUL3<sup>BPM</sup>, docking of the BPM-ERF complex to the  
12 CUL3<sup>BPM</sup> E3-ligase results in ubiquitination and subsequent degradation of ERFs; stabilized JAZ  
13 proteins interact with MYBs and MYCs, thereby inhibit the activity of MYBs and MYCs. JAs  
14 induce degradation of JAZs via the SCF<sup>COI1</sup> complex and the 26S proteasome to release MYBs  
15 and MYCs that in turn activates the expression of *CYP83B1*, in addition, JA stabilized ERFs not  
16 only at the transcriptional induction, but also on the de novo synthesized protein. JA promotes the  
17 formation of a ERF-MYB-bHLH ternary complexes, thus activating the expression of GLSs  
18 biosynthesis genes.

19

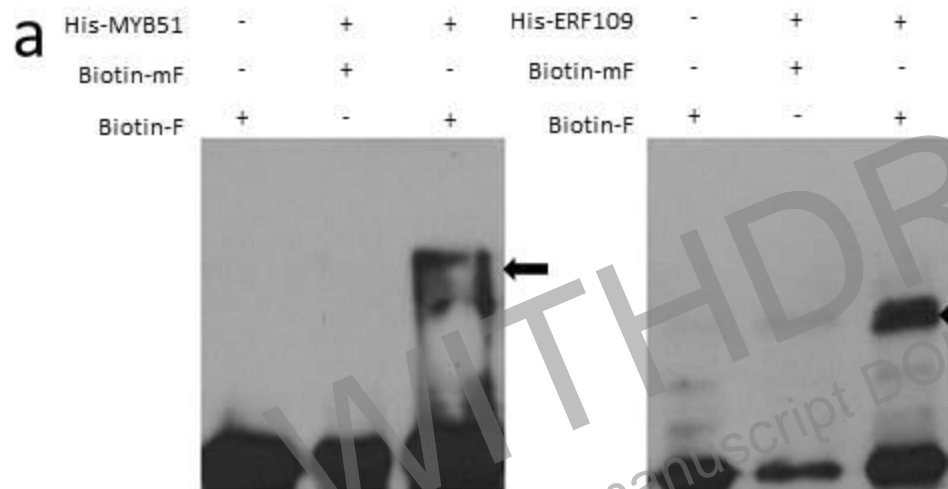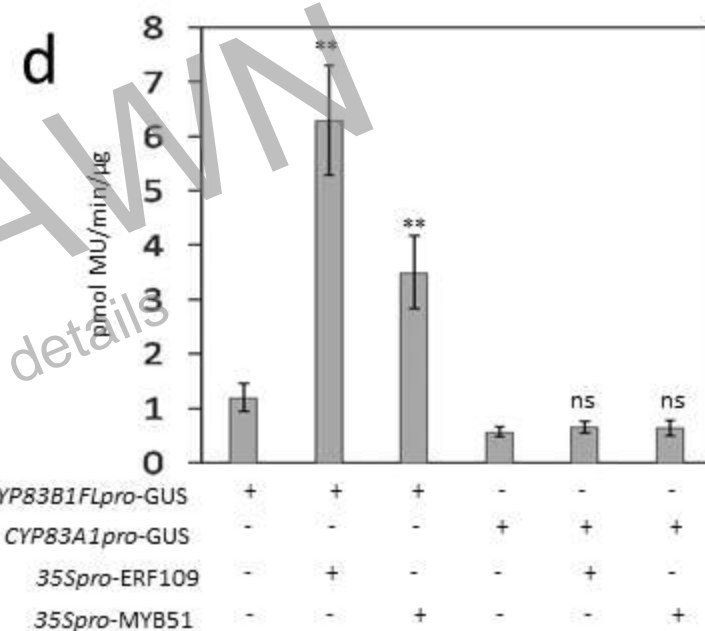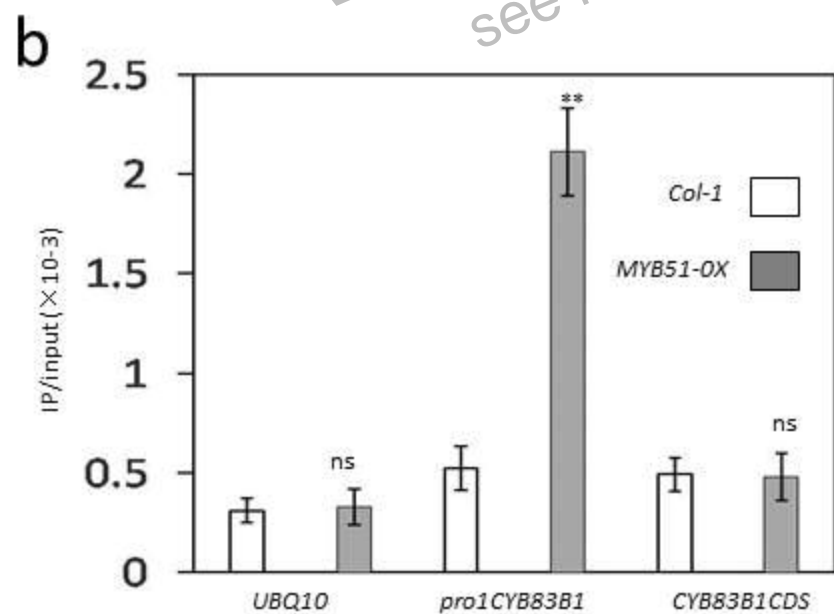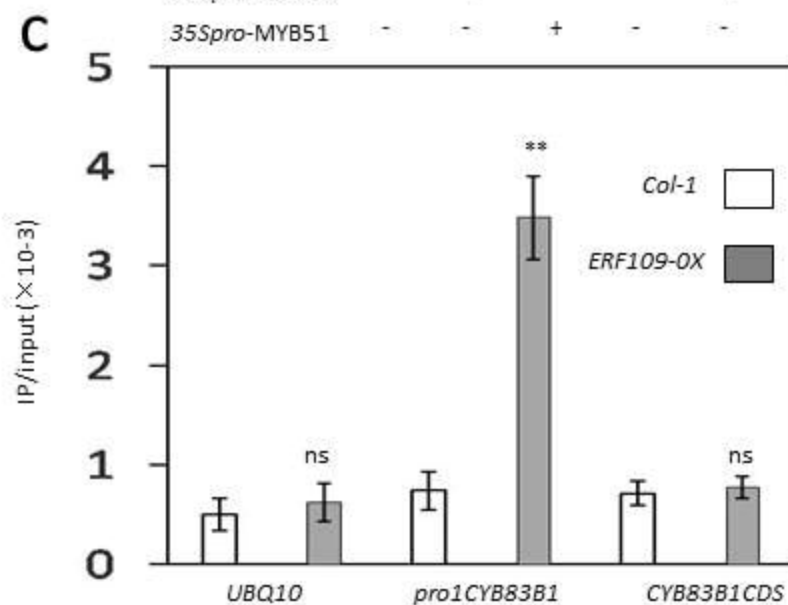



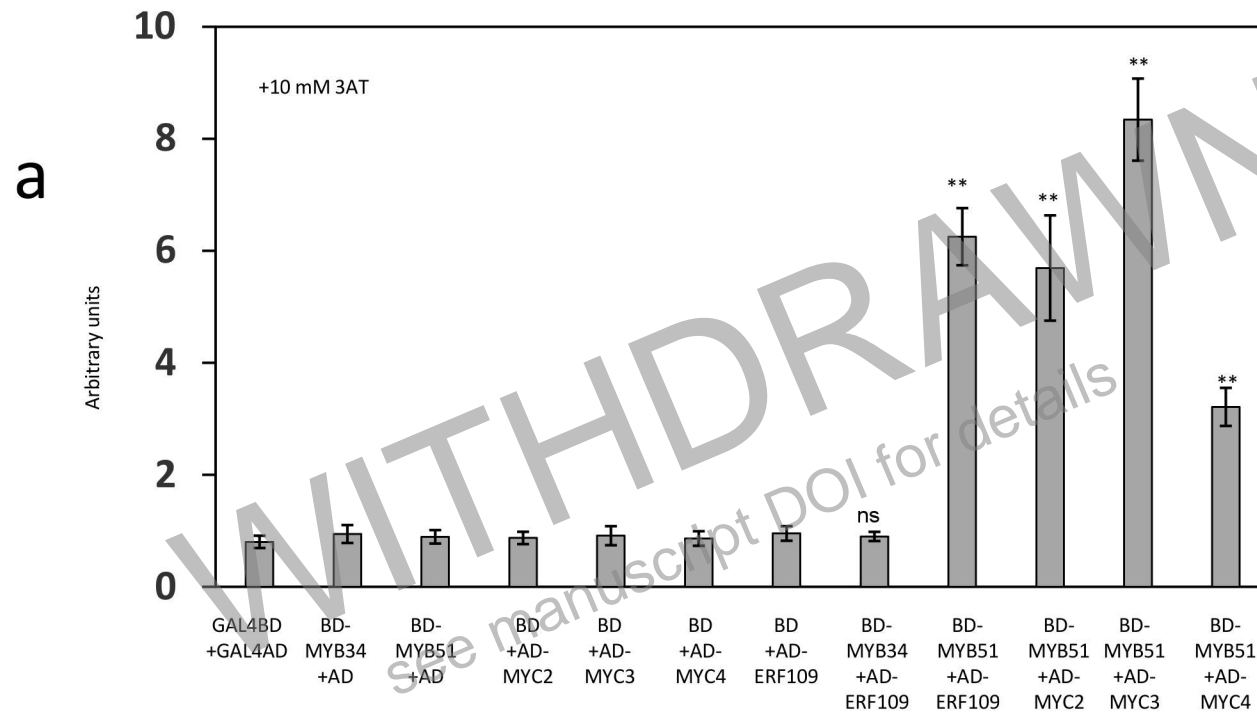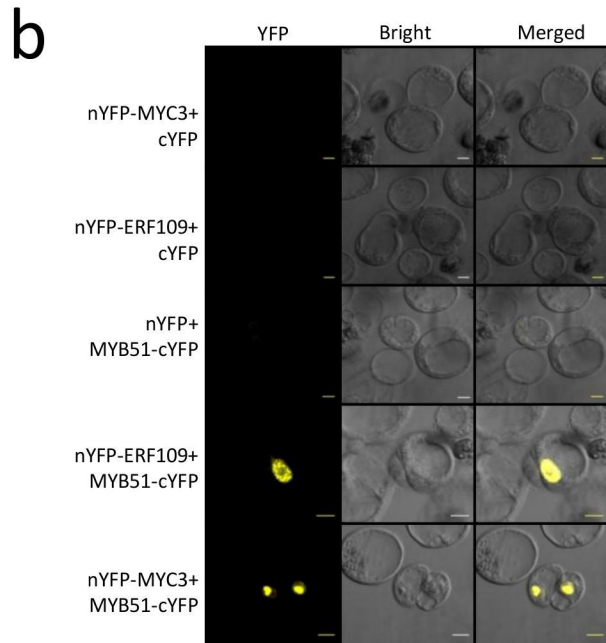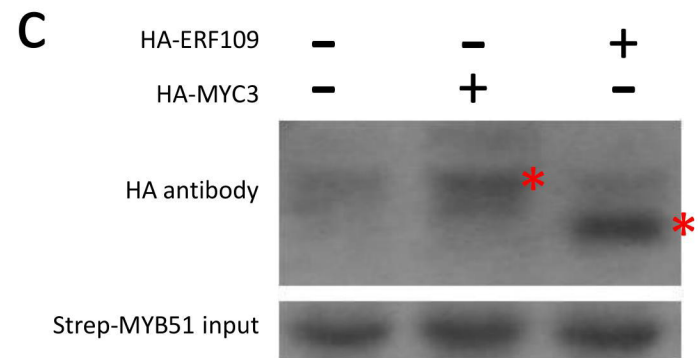



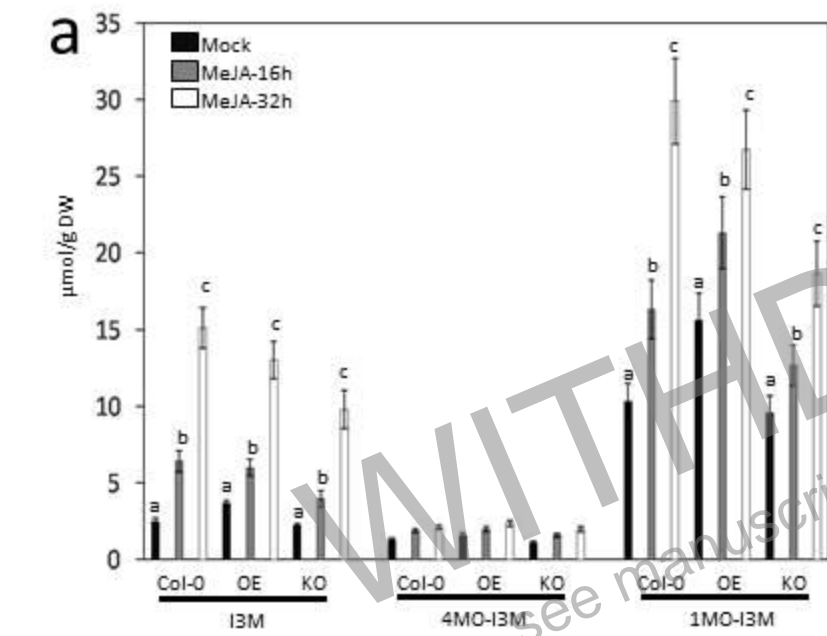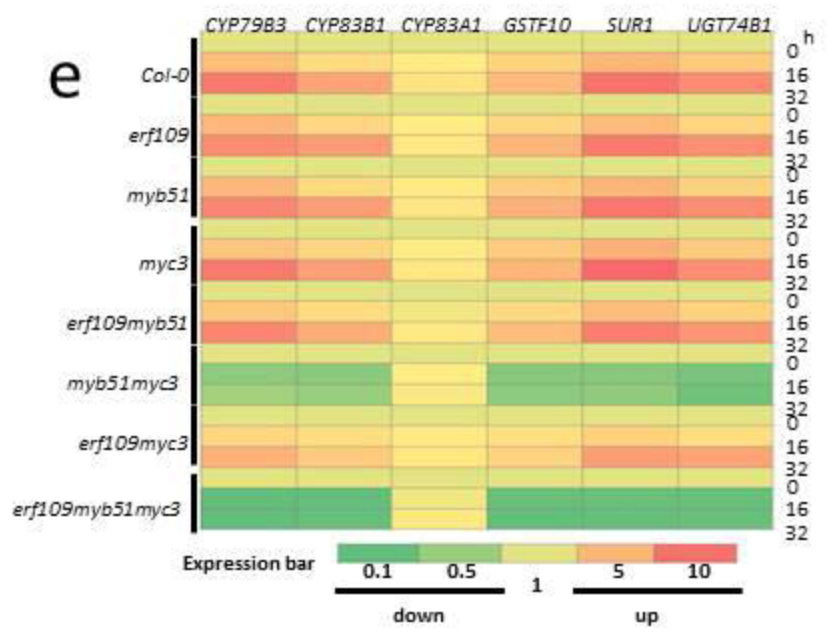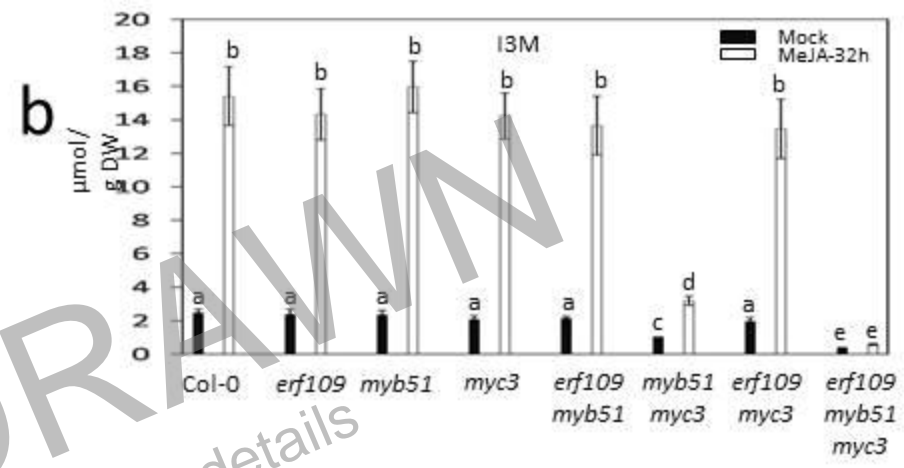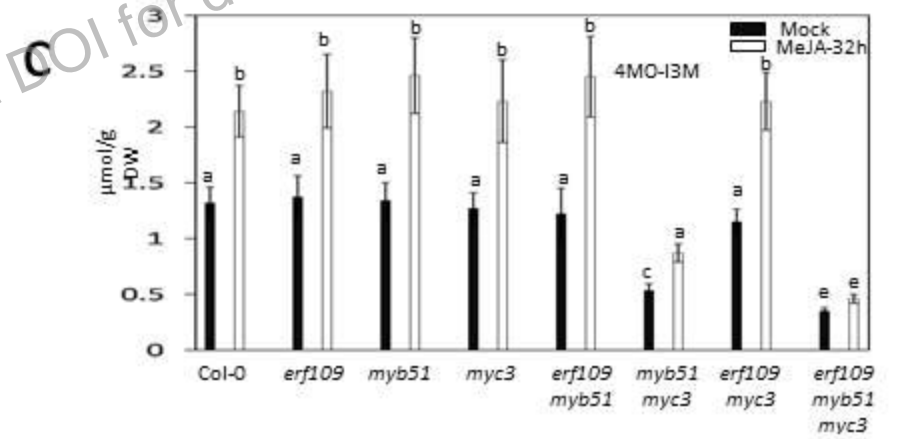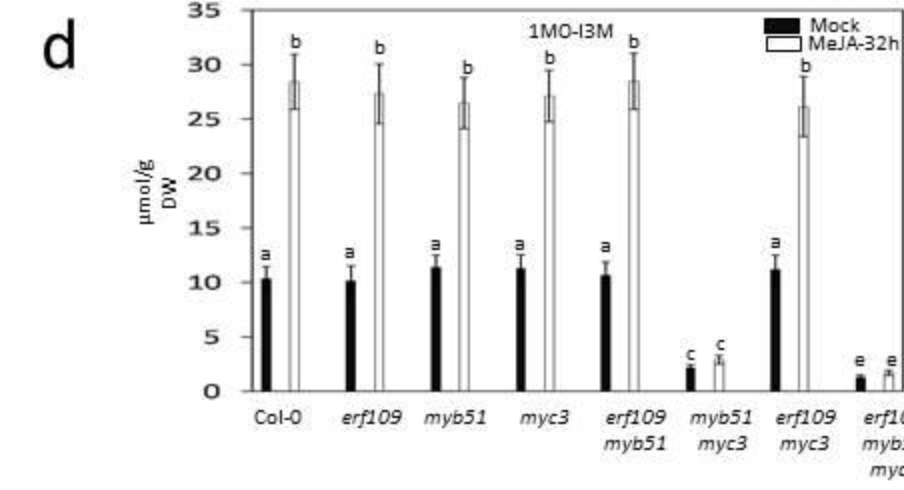

a

| +10 mM 3AT   | GAL4AD | GAL4AD-MYC3 | GAL4AD-MYB51 | GAL4AD-MYB34 |
|--------------|--------|-------------|--------------|--------------|
| GAL4BD       | 0.821  | 1.014       | 1.258        | 0.962        |
| GAL4BD-JAZ1  | 0.937  | 5.425 (+++) | 1.269        | 0.997        |
| GAL4BD-JAZ2  | 0.875  | 4.278 (+++) | 0.998        | 1.034        |
| GAL4BD-JAZ3  | 0.926  | 3.514 (++)  | 0.975        | 1.031        |
| GAL4BD-JAZ4  | 0.976  | 1.029       | 1.058        | 1.011        |
| GAL4BD-JAZ5  | 0.895  | 2.985 (+)   | 1.243        | 0.963        |
| GAL4BD-JAZ6  | 0.836  | 3.698 (++)  | 1.115        | 1.103        |
| GAL4BD-JAZ7  | 0.824  | 1.112       | 0.963        | 0.998        |
| GAL4BD-JAZ8  | 0.892  | 4.367 (+++) | 0.994        | 0.994        |
| GAL4BD-JAZ9  | 0.912  | 5.697 (+++) | 1.065        | 1.014        |
| GAL4BD-JAZ10 | 0.876  | 3.998 (++)  | 4.652 (+++)  | 1.002        |
| GAL4BD-JAZ11 | 0.813  | 4.567 (+++) | 1.265        | 0.987        |
| GAL4BD-JAZ12 | 0.875  | 3.925 (++)  | 1.127        | 0.996        |

b

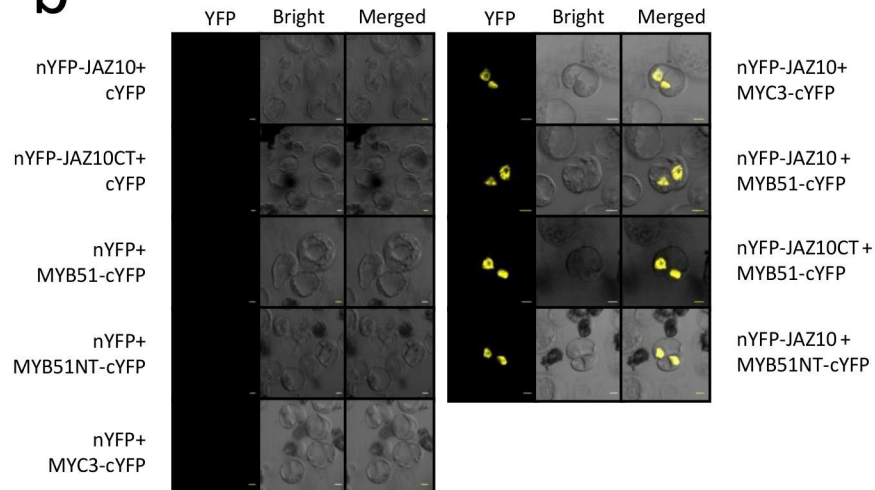

c

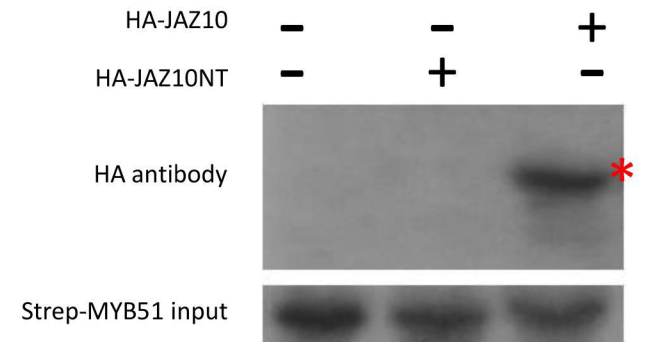

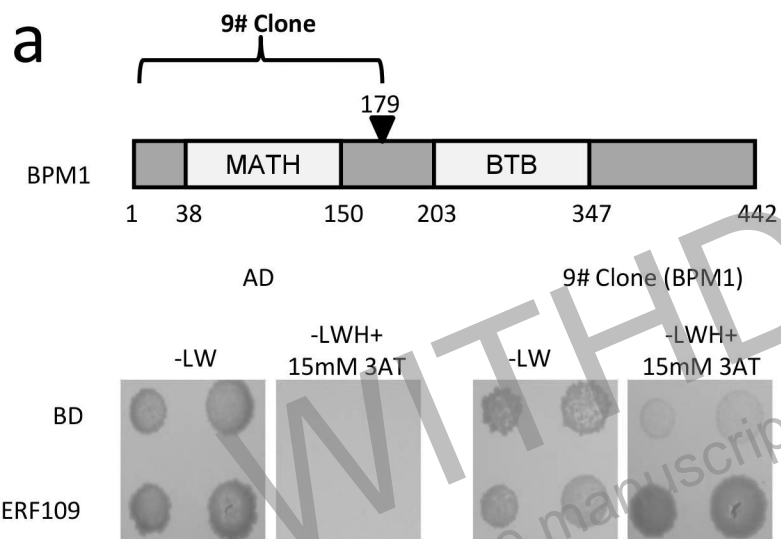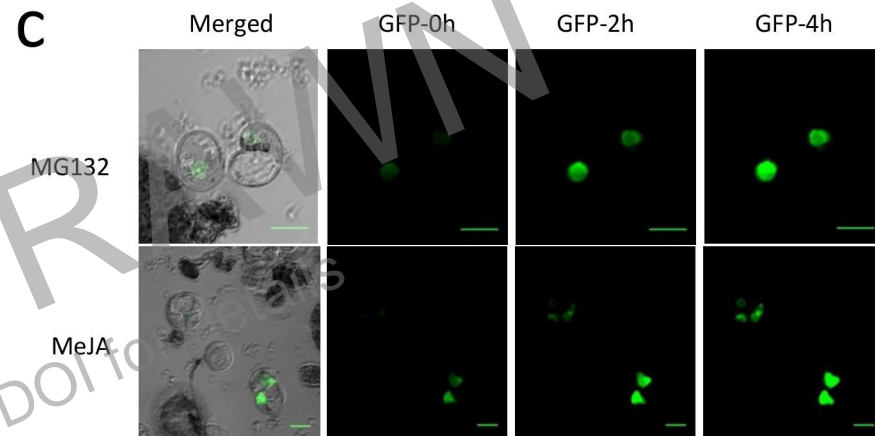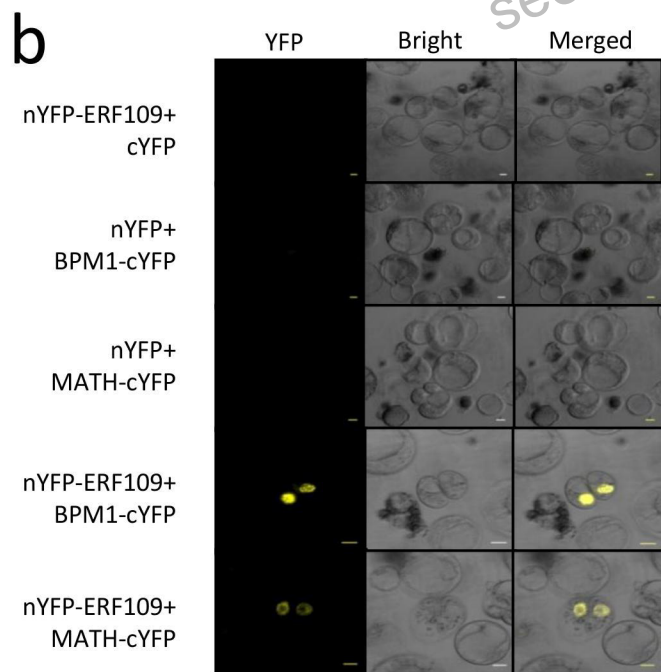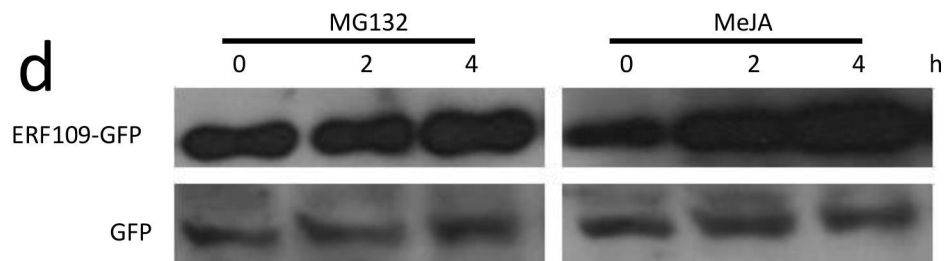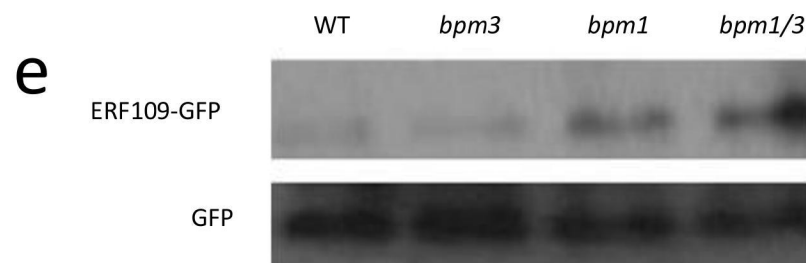

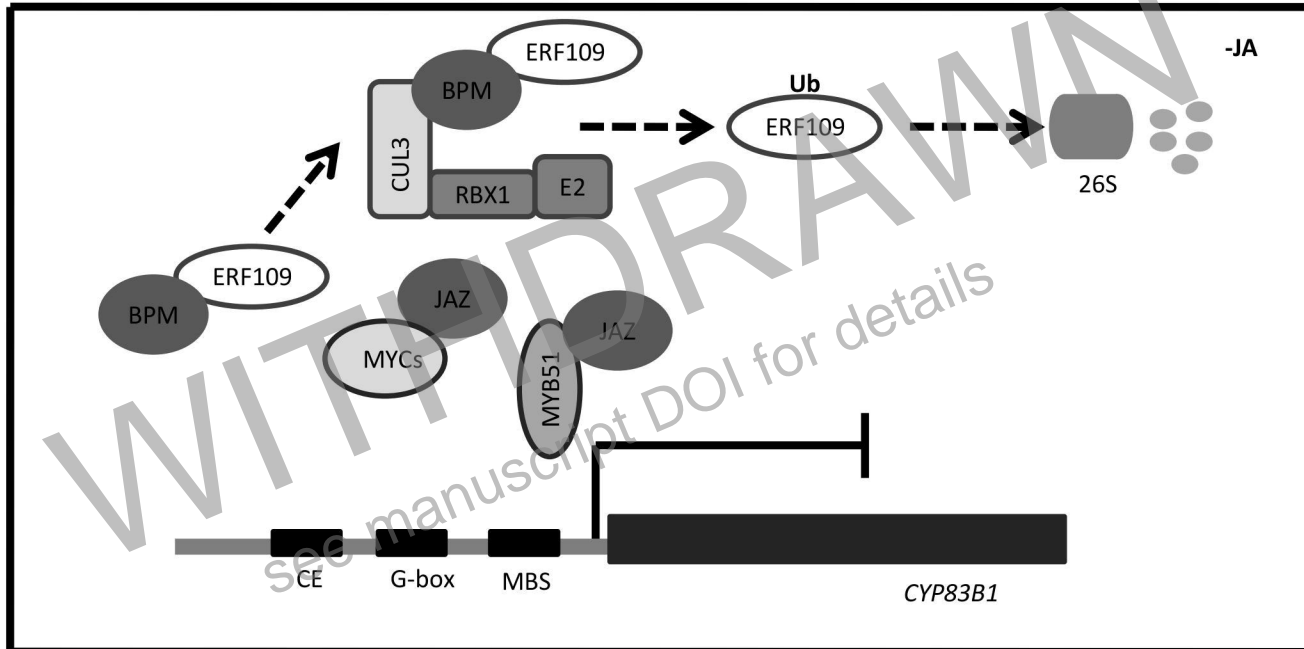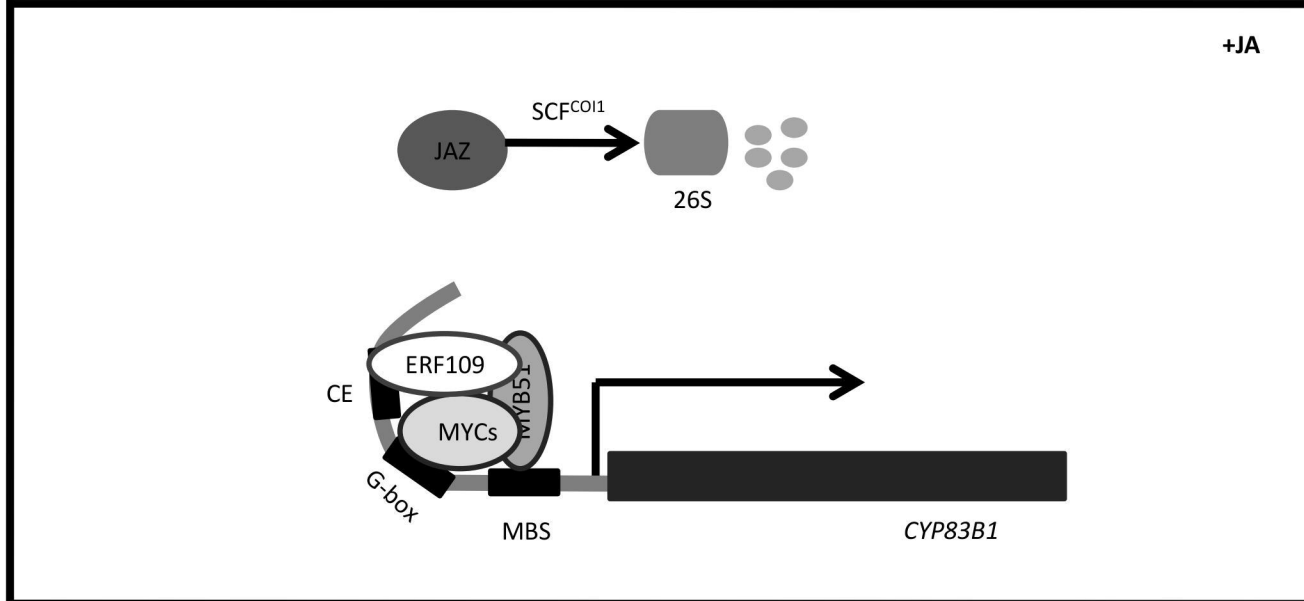

Source: http://biorxiv.org/content/10.1101/643494v1.full.pdf
